# Supplementary material for: Bacteriophages in Gut Microbiome Interactions in Patients with Inflammatory Bowel Disease: Differences by Sex and The Disease Type
Source: Research Square preprint supplement (doi:10.21203/rs.3.rs-1240997/v2), 2022-03-02
Supplement: Supplementary file 1 [file 57934f69d96c7de5c4a94be4.xlsx]

## Sheet: Description
Table S19 : Differential Correlations between Microbes in females Groups.
Table S20: Differential Correlations between Microbes in males Groups.
Table S21 : Differential Correlations between Microbes in males & females Groups.
Table S22 : Comments for the previous tables (S1, S2, & S3).
Table S23 : Important microbes in CD's or UC's gut interaction.
Table S24 :	38 Shared Edges in differential correlation Networks (between 12 bacteriophage nodes and one fungus node).
Table S25:	Abbreviations.

## Sheet: Table S19_Diff-Corrln._females
Table S19 : Differential Correlations between Microbes in females Groups.
Groups: NONF - UCF
SOURCE		abundance		TARGET		abundance			p (difference)	(r1-r2)	EVIDENCE		r1	p1	r2	p2	lfdr (in cond. 1)	lfdr (in cond. 2)	lfdr (difference)
Streptococcus virus Sfi19	V-279	0.000252203	0.0530282	Enterobacteria phage 9g	V-252*	0.0265641	0.00160243		0.000731313	-0.525365	-0.5		-0.0424921	0.724952	0.482873	9.97301e-06	0.92859	0.000274258	0.0402222
Groups: NONF - CDF
SOURCE		abundance		TARGET		abundance			p (difference)	(r1-r2)	EVIDENCE		r1	p1	r2	p2	lfdr (in cond. 1)	lfdr (in cond. 2)	lfdr (difference)
Escherichia virus HK022	V-247	0.0462895	0.174125	Enterobacteria phage IME10	V-193	0.107813	0.00202435		7.16438e-05	0.467899	0.5		0.788765	3.147e-16	0.320865	0.0179999	1.10145e-14	0.0590621	0.000835844
Enterobacteria phage mEpX2	V-334	0.0258483	0.00110781	Enterobacteria phage mEp235	V-330	0.107605	0.0024515		0.000484405	0.216188	0.2		0.903001	5.1055e-27	0.686813	9.79634e-09	5.36078e-25	7.34725e-08	0.00508625
Enterobacteria phage mEpX2	V-334	0.0258483	0.00110781	Enterobacteria phage HK542	V-324	0.02499	0.000319267		0	-0.197695	-0.2		0.802305	4.08482e-17	1	0	2.14453e-15	0	0
Enterobacteria phage 9g	V-252*	0.0265641	0.00014862	Enterobacteria phage mEp235	V-330	0.107605	0.0024515		0.00535726	-0.371841	-0.4		0.314972	0.00746503	0.686813	9.79634e-09	0.0412541	7.34725e-08	0.046876
Enterobacteria phage HK542	V-324	0.02499	0.000319267	Enterobacteria phage IME10	V-193	0.107813	0.00202435		0	-0.471803	-0.5		0.528197	2.20019e-06	1	0	2.56689e-05	0	0
Clostridium_ramosum	B-296	0.0137179	0.00118606	Salmonella phage SSU5	V-439*	0.52017	0.0183747		0.000574823	-0.564858	-0.6		-0.0045721	0.969814	0.560286	1.05453e-05	0.969814	7.3817e-05	0.00548695
Enterobacteria phage 9g	V-252*	0.0265641	0.00014862	Enterobacteria phage mEpX2	V-334	0.0258483	0.00110781		0	-0.642436	-0.6		0.357564	0.00220379	1	0	0.0136117	0	0
Enterobacteria phage mEpX2	V-334	0.0258483	0.00110781	Enterobacteria phage IME10	V-193	0.107813	0.00202435		0	-0.599188	-0.6		0.400812	0.000532626	1	0	0.0039947	0	0
Enterobacteria phage mEp235	V-330	0.107605	0.0024515	Salmonella phage SSU5	V-439*	0.52017	0.0183747		1.30967e-07	-0.664135	-0.7		0.144524	0.229174	0.808659	1.40667e-13	0.41441	2.11e-12	1.71894e-06
Dysgonomonas_unclassified	B-89	2.22654e-05	0.308261	Escherichia virus HK022	V-247	0.0462895	0.174125		4.95446e-10	-0.84835	-0.8		-0.0454009	0.706948	0.802949	2.80184e-13	0.826977	3.67741e-12	7.43169e-09
Enterobacteria phage 9g	V-252*	0.0265641	0.00014862	Enterobacteria phage HK542	V-324	0.02499	0.000319267		0	-0.806531	-0.8		0.193469	0.105969	1	0	0.292809	0	0
Enterobacteria phage 9g	V-252*	0.0265641	0.00014862	Enterobacteria phage IME10	V-193	0.107813	0.00202435		0	-0.945345	-0.9		0.0546547	0.65077	1	0	0.826977	0	0
Groups: CDF - UCF
SOURCE		abundance		TARGET		abundance			p (difference)	(r1-r2)	EVIDENCE		r1	p1	r2	p2	lfdr (in cond. 1)	lfdr (in cond. 2)	lfdr (difference)
Eubacterium_ventriosum	B-246	0.0415539	0.202645	Bacteroides_gallinarum	B-67	0.0924803	0.00658434		6.31789e-06	0.675538	0.7		0.679328	1.62909e-08	0.00379021	0.974077	4.98501e-07	0.974077	0.000483318
Streptococcus phage SpSL1	V-458	0.010631	1.02036	Enterobacteria phage If1	V-541	0.285054	0.0896372		0.000927535	0.567058	0.6		0.45841	0.000490436	-0.108648	0.350178	0.00461807	0.754608	0.0246084
Enterobacteria phage HK633	V-328	0.00140114	0.0231365	Turicibacter_unclassified	B-313	0.00412017	5e-05		0.000965034	0.548075	0.5		0.514306	6.9426e-05	-0.0337692	0.772125	0.00081709	0.855908	0.0246084
Turicibacter_unclassified	B-313	0.00412017	5e-05	Enterobacteria phage HK106	V-320	0.00247732	0.0233207		0.000965034	0.548075	0.5		0.514306	6.9426e-05	-0.0337692	0.772125	0.00081709	0.855908	0.0246084
Streptococcus phage SpSL1	V-458	0.010631	1.02036	Enterobacteria phage mEp237	V-331	0.0917669	0.0320194		0.00271695	0.525295	0.5		0.385046	0.00403968	-0.140249	0.226902	0.0309035	0.680705	0.0461882
Streptococcus phage SpSL1	V-458	0.010631	1.02036	Lactococcus phage bIL310	V-389	0.0723609	0.00174504		0.000275678	0.527801	0.5		0.665163	4.10061e-08	0.137362	0.236703	1.04566e-06	0.696453	0.0140596
Enterobacteria phage HK633	V-328	0.00140114	0.0231365	Enterobacteria phage HK106	V-320	0.00247732	0.0233207		8.88178e-16	0.172273	0.2		1	0	0.827727	2.99297e-20	0	4.57924e-18	1.35891e-13
Enterobacteria phage HK106	V-320	0.00247732	0.0233207	Enterobacteria phage VT2phi_272	V-195*	0.260398	0.103244		0.00199468	-0.460929	-0.5		0.158305	0.252911	0.619234	2.47777e-09	0.614213	7.58199e-08	0.0435981
Streptococcus phage SpSL1	V-458	0.010631	1.02036	Parabacteroides phage YZ-2015b	V-543	23.6646	11.2888		0.00262483	-0.532059	-0.5		-0.186855	0.176081	0.345204	0.002258	0.478573	0.020322	0.0461882
Abbreviations: B,Bacteria; F,fungus; V,virus; CDM, CD in males; CDF, CD in femals; UCM, UC in males; UCF, UC in females; NONM, non-IBD in males; NONF, non-IBD in females.

## Sheet: Table S20_Diff.Corrln._males
Table S20 : Differential Correlations between Microbes in males Groups.
Groups: CDM - UCM
SOURCE		abundance		TARGET		abundance			p (difference)	(r1-r2)	EVIDENCE		r1	p1	r2	p2	lfdr (in cond. 1)	lfdr (in cond. 2)	lfdr (difference)
Escherichia phage K1-dep(4)	V-222	2.12162	0.0685101	Malassezia globosa CBS 7966	F-9	3.94437	28.5005		2.35699e-05	0.673471	0.7		0.514957	8.62708e-09	-0.158514	0.261696	4.32586e-08	0.680411	0.000306409
Pseudomonas phage OBP	V-135	0.00117447	0.000157629	Fusobacterium_nucleatum	B-333	0.444624	0.00528003		5.07185e-05	0.610726	0.6		0.591118	1.05608e-11	-0.0196078	0.890264	6.50324e-11	0.900526	0.000635793
Staphylococcus phage SA1	V-148*	0.00879143	0.00318743	Fusobacterium_nucleatum	B-333	0.444624	0.00528003		0.00036829	0.557111	0.6		0.522482	4.78055e-09	-0.0346298	0.807446	2.46761e-08	0.900526	0.00366155
Anaerostipes_unclassified	B-197	0.0212401	0.00254692	Fusobacterium_nucleatum	B-333	0.444624	0.00528003		5.55518e-05	0.613438	0.6		0.578808	3.51461e-11	-0.0346298	0.807446	2.02234e-10	0.900526	0.000672368
Salmonella phage FSL SP-004	V-17	0.0868197	0.028739	Fusobacterium_nucleatum	B-333	0.444624	0.00528003		6.02096e-05	0.609042	0.6		0.581042	2.83629e-11	-0.0280002	0.843794	1.65923e-10	0.900526	0.000704453
Enterobacteria phage WPhi	V-12	0.320165	0.102721	Fusobacterium_nucleatum	B-333	0.444624	0.00528003		9.33656e-05	0.59907	0.6		0.56444	1.34433e-10	-0.0346298	0.807446	7.48985e-10	0.900526	0.0010241
Escherichia phage pro147	V-13	0.494377	0.17242	Fusobacterium_nucleatum	B-333	0.444624	0.00528003		0.000155649	0.584158	0.6		0.549528	5.06237e-10	-0.0346298	0.807446	2.69226e-09	0.900526	0.00165554
Escherichia phage K1-dep(1)	V-221	1.21637	0.018772	Malassezia globosa CBS 7966	F-9	3.94437	28.5005		7.84155e-05	0.626177	0.6		0.515173	8.48383e-09	-0.111004	0.433377	4.31569e-08	0.900526	0.000887866
Escherichia phage TL-2011c	V-173	0.0155185	0.00400483	Fusobacterium_nucleatum	B-333	0.444624	0.00528003		0.000819699	0.525774	0.5		0.506166	1.68898e-08	-0.0196078	0.890264	8.12099e-08	0.900526	0.00737729
Escherichia Stx1 converting phage	V-200	0.0327393	0.00730835	Fusobacterium_nucleatum	B-333	0.444624	0.00528003		0.0024357	0.486063	0.5		0.458063	4.86028e-07	-0.0280002	0.843794	2.15944e-06	0.900526	0.01819
Shigella phage 75/02 Stx	V-169	0.0397033	0.00634118	Fusobacterium_nucleatum	B-333	0.444624	0.00528003		0.00137343	0.506821	0.5		0.487213	6.75117e-08	-0.0196078	0.890264	3.20224e-07	0.900526	0.011211
Oscillibacter_sp_KLE_1745	B-265	0.0651362	0.0139825	Bacteroides_eggerthii	B-62	0.120129	0.96805		0.00413244	0.472835	0.5		0.389206	2.64183e-05	-0.0836294	0.55557	0.000104189	0.900526	0.027894
Enterobacteria phage If1	V-541	0.4086	0.103121	Fusobacterium_nucleatum	B-333	0.444624	0.00528003		0.00155397	0.505507	0.5		0.470877	2.08733e-07	-0.0346298	0.807446	9.51499e-07	0.900526	0.012121
Megamonas_unclassified	B-322	0.000235003	0.377453	Proteus_mirabilis	B-378	0.562882	0.000417787		0.00721467	0.442114	0.4		0.387074	2.94942e-05	-0.0550399	0.698353	0.000115027	0.900526	0.0436612
Escherichia phage TL-2011c	V-173	0.0155185	0.00400483	Enterobacteria phage WPhi	V-12	0.320165	0.102721		3.85947e-11	0.359707	0.4		0.948414	1.06263e-55	0.588707	4.42277e-06	7.45965e-54	2.317e-05	7.96867e-10
Escherichia phage TL-2011c	V-173	0.0155185	0.00400483	Enterobacteria phage If1	V-541	0.4086	0.103121		3.25295e-13	0.390395	0.4		0.956015	2.37585e-59	0.565621	1.24559e-05	2.08481e-57	6.07225e-05	7.61191e-12
Shigella phage 75/02 Stx	V-169	0.0397033	0.00634118	Enterobacteria phage If1	V-541	0.4086	0.103121		5.63223e-08	0.352624	0.4		0.918244	2.97361e-45	0.565621	1.24559e-05	1.30467e-43	6.07225e-05	1.02123e-06
Fusobacterium_nucleatum	B-333	0.444624	0.00528003	Proteus_mirabilis	B-378	0.562882	0.000417787		0.00834486	0.429424	0.4		0.409816	8.74889e-06	-0.0196078	0.890264	3.69983e-05	0.900526	0.0496448
Pseudomonas phage OBP	V-135	0.00117447	0.000157629	Enterobacteria phage WPhi	V-12	0.320165	0.102721		0.00120336	0.255096	0.3		0.843803	5.79881e-31	0.588707	4.42277e-06	1.01769e-29	2.317e-05	0.0103019
Escherichia phage TL-2011c	V-173	0.0155185	0.00400483	Escherichia phage pro147	V-13	0.494377	0.17242		2.85099e-07	0.326891	0.3		0.915599	1.54561e-44	0.588707	4.42277e-06	6.02786e-43	2.317e-05	4.35087e-06
Escherichia Stx1 converting phage	V-200	0.0327393	0.00730835	Salmonella phage FSL SP-004	V-17	0.0868197	0.028739		0.00617708	0.270531	0.3		0.770531	7.43849e-23	0.5	0.000160535	8.42229e-22	0.000713263	0.040151
Escherichia phage K1-dep(1)	V-221	1.21637	0.018772	Escherichia phage K1-dep(4)	V-222	2.12162	0.0685101		0	0.313649	0.3		0.999654	1.78446e-172	0.686005	1.99313e-08	6.26344e-170	1.58997e-07	0
Pseudomonas phage OBP	V-135	0.00117447	0.000157629	Escherichia phage pro147	V-13	0.494377	0.17242		0.00694189	0.226162	0.2		0.814869	2.47011e-27	0.588707	4.42277e-06	3.67034e-26	2.317e-05	0.0427475
Staphylococcus phage SA1	V-148*	0.00879143	0.00318743	Escherichia phage TL-2011c	V-173	0.0155185	0.00400483		0.00649233	0.249638	0.2		0.792172	6.63195e-25	0.542534	3.25475e-05	8.95313e-24	0.000148366	0.040693
Escherichia phage TL-2011c	V-173	0.0155185	0.00400483	Salmonella phage FSL SP-004	V-17	0.0868197	0.028739		0.000376274	0.192707	0.2		0.906713	2.702e-42	0.714006	2.80624e-09	9.48402e-41	2.29068e-08	0.00366155
Shigella phage 75/02 Stx	V-169	0.0397033	0.00634118	Enterobacteria phage WPhi	V-12	0.320165	0.102721		0.00297582	0.24126	0.2		0.829967	3.8386e-29	0.588707	4.42277e-06	6.41595e-28	2.317e-05	0.0213166
Salmonella phage FSL SP-004	V-17	0.0868197	0.028739	Enterobacteria phage WPhi	V-12	0.320165	0.102721		2.35277e-07	0.143666	0.1		0.96818	8.38464e-67	0.824513	5.8212e-14	1.4715e-64	1.13513e-12	3.75373e-06
Salmonella phage FSL SP-004	V-17	0.0868197	0.028739	Escherichia phage pro147	V-13	0.494377	0.17242		0.00178334	0.11209	0.1		0.936604	5.29324e-51	0.824513	5.8212e-14	3.09654e-49	1.13513e-12	0.0136077
Enterobacteria phage WPhi	V-12	0.320165	0.102721	Escherichia phage pro147	V-13	0.494377	0.17242		0.000385975	-0.0336217	0		0.966378	1.56414e-65	1	0	1.83005e-63	0	0.00366155
Staphylococcus phage SA1	V-148*	0.00879143	0.00318743	Enterobacteria phage WPhi	V-12	0.320165	0.102721		8.88178e-16	-0.147629	-0.1		0.850803	5.93522e-32	0.998432	2.84007e-64	1.09645e-30	6.23041e-63	2.39808e-14
Escherichia phage TL-2011c	V-173	0.0155185	0.00400483	Shigella phage 75/02 Stx	V-169	0.0397033	0.00634118		7.74936e-14	-0.124221	-0.1		0.875779	6.01165e-36	1	0	1.40673e-34	0	1.94287e-12
Enterobacteria phage WPhi	V-12	0.320165	0.102721	Enterobacteria phage If1	V-541	0.4086	0.103121		1.06367e-08	-0.0692672	-0.1		0.93021	7.98893e-49	0.999477	3.39265e-76	4.00588e-47	8.50587e-75	2.07415e-07
Enterobacteria phage If1	V-541	0.4086	0.103121	Escherichia phage pro147	V-13	0.494377	0.17242		4.85167e-12	-0.102849	-0.1		0.896628	5.24159e-40	0.999477	3.39265e-76	1.67254e-38	8.50587e-75	1.06434e-10
Pseudomonas phage OBP	V-135	0.00117447	0.000157629	Escherichia phage TL-2011c	V-173	0.0155185	0.00400483		0	-0.218673	-0.2		0.781327	7.5504e-24	1	0	9.13859e-23	0	0
Staphylococcus phage SA1	V-148*	0.00879143	0.00318743	Enterobacteria phage If1	V-541	0.4086	0.103121		0	-0.223135	-0.2		0.776342	2.20599e-23	0.999477	3.39265e-76	2.58101e-22	8.50587e-75	0
Staphylococcus phage SA1	V-148*	0.00879143	0.00318743	Escherichia phage pro147	V-13	0.494377	0.17242		0	-0.178435	-0.2		0.819996	6.27355e-28	0.998432	2.84007e-64	1.00092e-26	6.23041e-63	0
Pseudomonas phage OBP	V-135	0.00117447	0.000157629	Shigella phage 75/02 Stx	V-169	0.0397033	0.00634118		0	-0.332946	-0.3		0.667054	1.77317e-15	1	0	1.27017e-14	0	0
Salmonella phage FSL SP-004	V-17	0.0868197	0.028739	Lactobacillus phage Lc-Nu	V-363	0.079722	0.00135399		0.00632557	-0.313433	-0.3		0.400572	1.4493e-05	0.714006	2.80624e-09	5.84716e-05	2.29068e-08	0.0403686
Pseudomonas phage OBP	V-135	0.00117447	0.000157629	Lactobacillus phage Lc-Nu	V-363	0.079722	0.00135399		0	-0.448774	-0.4		0.551226	4.36748e-10	1	0	2.35844e-09	0	0
Pseudomonas phage OBP	V-135	0.00117447	0.000157629	Proteus_mirabilis	B-378	0.562882	0.000417787		0	-0.366905	-0.4		0.633095	1.16297e-13	1	0	7.42184e-13	0	0
Anaerotruncus_unclassified	B-199	0.00717639	0.00299154	Anaerostipes_unclassified	B-197	0.0212401	0.00254692		0.00406171	-0.438452	-0.4		0.0843315	0.381066	0.522783	7.01175e-05	0.610563	0.000315529	0.027894
Escherichia Stx1 converting phage	V-200	0.0327393	0.00730835	Lactobacillus phage Lc-Nu	V-363	0.079722	0.00135399		0.00150492	-0.379529	-0.4		0.334476	0.000355103	0.714006	2.80624e-09	0.00124641	2.29068e-08	0.0120052
Bacteroides_eggerthii	B-62	0.120129	0.96805	Malassezia globosa CBS 7966	F-9	3.94437	28.5005		0.00586784	-0.441072	-0.4		0.0067898	0.943876	0.447862	0.000870678	0.957516	0.00328611	0.0388606
Staphylococcus phage SA1	V-148*	0.00879143	0.00318743	Desulfovibrio_desulfuricans	B-346	0.0165211	0.000417787		0.00136373	-0.52728	-0.5		-0.123107	0.200092	0.404173	0.00296249	0.408328	0.0107199	0.011211
Escherichia phage TL-2011c	V-173	0.0155185	0.00400483	Proteus_mirabilis	B-378	0.562882	0.000417787		0	-0.489988	-0.5		0.510012	1.26182e-08	1	0	6.23799e-08	0	0
Escherichia Stx1 converting phage	V-200	0.0327393	0.00730835	Streptococcus phage TP-J34	V-460	0.753046	0.125003		0.0026427	-0.499324	-0.5		-0.128436	0.181155	0.370888	0.00679388	0.394941	0.0237883	0.0193247
Shigella phage 75/02 Stx	V-169	0.0397033	0.00634118	Proteus_mirabilis	B-378	0.562882	0.000417787		0	-0.516863	-0.5		0.483137	8.9964e-08	1	0	4.21032e-07	0	0
Salmonella phage FSL SP-004	V-17	0.0868197	0.028739	Streptococcus phage TP-J34	V-460	0.753046	0.125003		0.00346342	-0.487351	-0.5		-0.132629	0.167203	0.354721	0.00987272	0.371444	0.0339738	0.0243132
Enterobacteria phage fiAA91-ss	V-10	1.02752	0.235012	Streptococcus phage TP-J34	V-460	0.753046	0.125003		0.00101223	-0.527794	-0.5		-0.0611283	0.525827	0.466666	0.000487972	0.692088	0.00197797	0.00888235
Escherichia phage TL-2011c	V-173	0.0155185	0.00400483	Lactobacillus phage Lc-Nu	V-363	0.079722	0.00135399		0	-0.642281	-0.6		0.357719	0.000124702	1	0	0.00045124	0	0
Desulfovibrio_desulfuricans	B-346	0.0165211	0.000417787	Salmonella phage FSL SP-004	V-17	0.0868197	0.028739		0.000238811	-0.590407	-0.6		-0.110784	0.249243	0.479623	0.000321029	0.480684	0.00140851	0.00246538
Lactobacillus phage Lc-Nu	V-363	0.079722	0.00135399	Proteus_mirabilis	B-378	0.562882	0.000417787		0	-0.551739	-0.6		0.448261	9.06831e-07	1	0	3.97872e-06	0	0
Streptococcus phage TP-J34	V-460	0.753046	0.125003	Wickerhamomyces ciferrii	F-2	3.77741	15.2627		0.000564429	-0.558195	-0.6		-0.102266	0.287729	0.455928	0.000681935	0.529662	0.00260173	0.00521354
Anaerostipes_unclassified	B-197	0.0212401	0.00254692	Lactobacillus phage Lc-Nu	V-363	0.079722	0.00135399		6.9886e-06	-0.687886	-0.7		-0.099179	0.302607	0.588707	4.42277e-06	0.547499	2.317e-05	9.4346e-05
Staphylococcus phage SA1	V-148*	0.00879143	0.00318743	Streptococcus phage TP-J34	V-460	0.753046	0.125003		5.81895e-08	-0.812333	-0.8		-0.167273	0.080696	0.64506	2.44374e-07	0.200882	1.825e-06	1.02123e-06
Shigella phage 75/02 Stx	V-169	0.0397033	0.00634118	Lactobacillus phage Lc-Nu	V-363	0.079722	0.00135399		0	-0.76986	-0.8		0.23014	0.0155756	1	0	0.0448443	0	0
Enterobacteria phage WPhi	V-12	0.320165	0.102721	Streptococcus phage TP-J34	V-460	0.753046	0.125003		5.3721e-07	-0.759665	-0.8		-0.141265	0.141003	0.6184	1.03218e-06	0.323477	7.10382e-06	7.54242e-06
Enterobacteria phage If1	V-541	0.4086	0.103121	Streptococcus phage TP-J34	V-460	0.753046	0.125003		1.65309e-07	-0.789225	-0.8		-0.157756	0.0997673	0.631469	5.18128e-07	0.241506	3.78881e-06	2.76303e-06
Escherichia phage pro147	V-13	0.494377	0.17242	Streptococcus phage TP-J34	V-460	0.753046	0.125003		4.14753e-07	-0.768029	-0.8		-0.149629	0.118715	0.6184	1.03218e-06	0.281548	7.10382e-06	6.06577e-06
Groups: NONM - CDM
SOURCE		abundance		TARGET		abundance			p (difference)	(r1-r2)	EVIDENCE		r1	p1	r2	p2	lfdr (in cond. 1)	lfdr (in cond. 2)	lfdr (difference)
Enterobacteria phage WPhi	V-12	0.00199478	0.320165	Bacteroides_sp_1_1_6	B-76	0.0534833	0.710908		0	1.08963	1.1		1	0	-0.089631	0.351753	0	0.650039	0
Shigella phage Ss-VASD	V-174	0.00343368	0.0145236	Bacteroides_sp_1_1_6	B-76	0.0534833	0.710908		9.0068e-12	0.797312	0.8		0.710939	1.41941e-15	-0.086373	0.369603	2.18589e-14	0.671048	7.70581e-11
Escherichia virus P2	V-16	0.00303839	0.631405	Bacteroides_sp_1_1_6	B-76	0.0534833	0.710908		9.12744e-08	0.679618	0.7		0.583637	8.25609e-10	-0.0959808	0.318541	6.5764e-09	0.618344	5.40625e-07
Escherichia phage TL-2011c	V-173	0.00486971	0.0155185	Bacteroides_sp_1_1_6	B-76	0.0534833	0.710908		1.03157e-07	0.676468	0.7		0.583637	8.25609e-10	-0.0928314	0.334752	6.5764e-09	0.628681	5.81203e-07
Yersinia phage L-413C	V-21	0.0103605	0.394923	Bacteroides_sp_1_1_6	B-76	0.0534833	0.710908		1.03157e-07	0.676468	0.7		0.583637	8.25609e-10	-0.0928314	0.334752	6.5764e-09	0.628681	5.81203e-07
Lactococcus_lactis	B-163	6.77419e-06	0.000829176	Escherichia virus P2	V-16	0.00303839	0.631405		7.89213e-06	0.56108	0.6		0.570949	2.29071e-09	0.00986954	0.918493	1.6536e-08	0.953098	3.72058e-05
Staphylococcus phage SA1	V-148*	0.00106354	0.00879143	Bacteroides_sp_1_1_6	B-76	0.0534833	0.710908		2.07293e-07	0.565591	0.6		0.710939	1.41941e-15	0.145348	0.129756	2.18589e-14	0.285463	1.06411e-06
Lactococcus_lactis	B-163	6.77419e-06	0.000829176	Phascolarctobacterium_succinatutens	B-326*	0.0651681	2.25455e-05		0.00044873	0.468	0.5		0.447106	7.02674e-06	-0.0208942	0.828473	3.60706e-05	0.940707	0.00172761
Shigella phage 75/02 Stx	V-169	0.00983623	0.0397033	Bacteroides_sp_1_1_6	B-76	0.0534833	0.710908		0.000110809	0.500789	0.5		0.508204	1.98987e-07	0.00741479	0.938719	1.24232e-06	0.959487	0.000465397
Escherichia phage pro483	V-14	0.014353	0.526578	Bacteroides_sp_1_1_6	B-76	0.0534833	0.710908		0.000144555	0.498696	0.5		0.486108	7.82481e-07	-0.0125877	0.896157	4.51883e-06	0.953098	0.000596291
Phascolarctobacterium_succinatutens	B-326*	0.0651681	2.25455e-05	Enterobacteria phage fiAA91-ss	V-10	0.100882	1.02752		0.00072073	0.459778	0.5		0.400853	6.84185e-05	-0.0589253	0.540878	0.000316093	0.861675	0.0026853
Mitsuokella_unclassified	B-325*	0.00234054	0.000453456	Enterobacteria phage WPhi	V-12	0.00199478	0.320165		0.0064632	0.379817	0.4		0.300017	0.0034807	-0.0797999	0.407268	0.0121825	0.695533	0.0219559
Enterobacteria phage fiAA91-ss	V-10	0.100882	1.02752	Bacteroides_sp_1_1_6	B-76	0.0534833	0.710908		0.0089015	0.363496	0.4		0.310398	0.00246135	-0.0530978	0.581687	0.00902494	0.895156	0.0289612
Salmonella phage SPN1S	V-208	0.000224542	0.0039534	Escherichia phage pro147	V-13	0.000310142	0.494377		0	0.297084	0.3		1	0	0.702916	1.13049e-17	0	4.83597e-17	0
Pseudomonas phage OBP	V-135	2.79619e-05	0.00117447	Salmonella phage SPN1S	V-208	0.000224542	0.0039534		0	0.244361	0.2		1	0	0.755639	1.43291e-21	0	7.88098e-21	0
Pseudomonas phage OBP	V-135	2.79619e-05	0.00117447	Escherichia phage pro147	V-13	0.000310142	0.494377		0	0.185131	0.2		1	0	0.814869	2.47011e-27	0	2.03784e-26	0
Shigella phage 75/02 Stx	V-169	0.00983623	0.0397033	Escherichia phage pro483	V-14	0.014353	0.526578		0	0.212539	0.2		0.999517	5.39636e-139	0.786978	2.16361e-24	2.49312e-137	1.38832e-23	0
Staphylococcus phage SA1	V-148*	0.00106354	0.00879143	Enterobacteria phage WPhi	V-12	0.00199478	0.320165		0.00968953	-0.139863	-0.1		0.710939	1.41941e-15	0.850803	5.93522e-32	2.18589e-14	6.85517e-31	0.0310872
Shigella phage Ss-VASD	V-174	0.00343368	0.0145236	Escherichia phage pro483	V-14	0.014353	0.526578		0.0116958	-0.149044	-0.1		0.683416	4.41874e-14	0.83246	1.85506e-29	5.67072e-13	1.7855e-28	0.0365097
Pseudomonas phage OBP	V-135	2.79619e-05	0.00117447	Escherichia virus P2	V-16	0.00303839	0.631405		0.00175059	-0.234165	-0.2		0.558262	6.0921e-09	0.792426	6.25279e-25	4.02078e-08	4.24822e-24	0.00631852
Staphylococcus phage SA1	V-148*	0.00106354	0.00879143	Shigella phage Ss-VASD	V-174	0.00343368	0.0145236		0.00782795	-0.230442	-0.2		0.5	3.34578e-07	0.730442	1.35818e-19	2.03388e-06	6.53622e-19	0.0258322
Enterobacteria phage WPhi	V-12	0.00199478	0.320165	Shigella phage Ss-VASD	V-174	0.00343368	0.0145236		0.000332824	-0.17491	-0.2		0.710939	1.41941e-15	0.88585	8.25917e-38	2.18589e-14	1.36276e-36	0.00130309
Shigella phage Ss-VASD	V-174	0.00343368	0.0145236	Enterobacteria phage fiAA91-ss	V-10	0.100882	1.02752		0.0114965	-0.238378	-0.2		0.451997	5.4141e-06	0.690375	7.19665e-17	2.8424e-05	2.86625e-16	0.0363792
Pseudomonas phage OBP	V-135	2.79619e-05	0.00117447	Wickerhamomyces ciferrii	F-2	3.77741	15.2627		0.00360132	-0.314156	-0.3		0.319428	0.0018025	0.633584	1.09898e-13	0.00682587	3.5259e-13	0.0124165
Escherichia phage pro147	V-13	0.000310142	0.494377	Wickerhamomyces ciferrii	F-2	3.77741	15.2627		0.00172334	-0.332868	-0.3		0.319428	0.0018025	0.652296	1.16597e-14	0.00682587	3.90348e-14	0.00631852
Staphylococcus phage SA1	V-148*	0.00106354	0.00879143	Wickerhamomyces ciferrii	F-2	3.77741	15.2627		0.00197595	-0.265645	-0.3		0.482513	9.69029e-07	0.748157	5.85459e-21	5.45965e-06	3.14514e-20	0.00702223
Enterobacteria phage WPhi	V-12	0.00199478	0.320165	Shigella phage 75/02 Stx	V-169	0.00983623	0.0397033		1.13961e-05	-0.321763	-0.3		0.508204	1.98987e-07	0.829967	3.8386e-29	1.24232e-06	3.54687e-28	5.16178e-05
Enterobacteria phage WPhi	V-12	0.00199478	0.320165	Wickerhamomyces ciferrii	F-2	3.77741	15.2627		0.000664575	-0.348145	-0.3		0.335399	0.00101452	0.683544	1.89726e-16	0.004261	7.30445e-16	0.00251667
Yersinia phage L-413C	V-21	0.0103605	0.394923	Enterobacteria phage fiAA91-ss	V-10	0.100882	1.02752		0.00222862	-0.315176	-0.3		0.351178	0.000557573	0.666355	1.9433e-15	0.00247691	7.01408e-15	0.00780017
Salmonella phage SPN1S	V-208	0.000224542	0.0039534	Erwinia phage vB_EamM_ChrisDB	V-113	0.0214538	5.13276e-05		0.00665712	-0.373228	-0.4		-0.0273596	0.794612	0.345868	0.000214786	0.933809	0.000620196	0.0222869
Escherichia phage pro147	V-13	0.000310142	0.494377	Escherichia virus P2	V-16	0.00303839	0.631405		4.94164e-10	-0.350449	-0.4		0.558262	6.0921e-09	0.90871	8.86658e-43	4.02078e-08	2.27576e-41	3.80506e-09
Staphylococcus phage SA1	V-148*	0.00106354	0.00879143	Escherichia virus P2	V-16	0.00303839	0.631405		3.80403e-06	-0.391552	-0.4		0.406007	5.3957e-05	0.797559	1.87606e-25	0.000254369	1.31324e-24	1.83069e-05
Staphylococcus phage SA1	V-148*	0.00106354	0.00879143	Yersinia phage L-413C	V-21	0.0103605	0.394923		5.45336e-07	-0.410863	-0.4		0.406007	5.3957e-05	0.81687	1.45417e-27	0.000254369	1.24413e-26	2.73853e-06
Enterobacteria phage WPhi	V-12	0.00199478	0.320165	Escherichia virus P2	V-16	0.00303839	0.631405		3.5083e-14	-0.357941	-0.4		0.583637	8.25609e-10	0.941578	7.33676e-53	6.5764e-09	3.38958e-51	3.85914e-13
Enterobacteria phage WPhi	V-12	0.00199478	0.320165	Escherichia phage TL-2011c	V-173	0.00486971	0.0155185		1.11022e-15	-0.364777	-0.4		0.583637	8.25609e-10	0.948414	1.06263e-55	6.5764e-09	6.13668e-54	1.5086e-14
Enterobacteria phage WPhi	V-12	0.00199478	0.320165	Yersinia phage L-413C	V-21	0.0103605	0.394923		0	-0.383711	-0.4		0.583637	8.25609e-10	0.967348	3.3021e-66	6.5764e-09	3.81393e-64	0
Enterobacteria phage WPhi	V-12	0.00199478	0.320165	Escherichia phage pro483	V-14	0.014353	0.526578		1.10446e-07	-0.37308	-0.4		0.486108	7.82481e-07	0.859188	3.30211e-33	4.51883e-06	4.48699e-32	6.0745e-07
Enterobacteria phage WPhi	V-12	0.00199478	0.320165	Enterobacteria phage fiAA91-ss	V-10	0.100882	1.02752		0.000161517	-0.386158	-0.4		0.310398	0.00246135	0.696557	2.92456e-17	0.00902494	1.20638e-16	0.00065457
Escherichia virus P2	V-16	0.00303839	0.631405	Enterobacteria phage fiAA91-ss	V-10	0.100882	1.02752		2.05709e-05	-0.40673	-0.4		0.337923	0.000923822	0.744653	1.11305e-20	0.00402647	5.84349e-20	9.13822e-05
Escherichia virus P2	V-16	0.00303839	0.631405	Wickerhamomyces ciferrii	F-2	3.77741	15.2627		8.11171e-05	-0.373713	-0.4		0.363738	0.000338488	0.737452	4.03462e-20	0.00153315	2.02608e-19	0.000347001
Butyricimonas_synergistica	B-85	0.000223396	5.45455e-06	Bacteroides_salyersiae	B-74	0.174801	0.0494183		0.000265081	-0.500784	-0.5		-0.11937	0.254422	0.381414	3.9372e-05	0.625229	0.000115126	0.00105575
Salmonella phage SPN1S	V-208	0.000224542	0.0039534	Enterobacteria phage fiAA91-ss	V-10	0.100882	1.02752		3.967e-05	-0.537338	-0.5		-0.0340681	0.745793	0.50327	2.09877e-08	0.933809	6.2156e-08	0.000172901
Escherichia virus P2	V-16	0.00303839	0.631405	Shigella phage Ss-VASD	V-174	0.00343368	0.0145236		1.15241e-13	-0.497757	-0.5		0.406007	5.3957e-05	0.903764	1.33854e-41	0.000254369	3.09204e-40	1.15742e-12
Escherichia virus P2	V-16	0.00303839	0.631405	Shigella phage 75/02 Stx	V-169	0.00983623	0.0397033		1.3563e-07	-0.499962	-0.5		0.277471	0.00708695	0.777433	1.74878e-23	0.023387	1.06308e-22	7.28616e-07
Shigella phage Ss-VASD	V-174	0.00343368	0.0145236	Yersinia phage L-413C	V-21	0.0103605	0.394923		1.09952e-09	-0.45635	-0.5		0.406007	5.3957e-05	0.862357	1.05515e-33	0.000254369	1.52337e-32	7.93717e-09
Shigella phage 75/02 Stx	V-169	0.00983623	0.0397033	Yersinia phage L-413C	V-21	0.0103605	0.394923		1.07066e-08	-0.52408	-0.5		0.277471	0.00708695	0.801551	7.17994e-26	0.023387	5.35021e-25	7.06634e-08
Pseudomonas phage OBP	V-135	2.79619e-05	0.00117447	Enterobacteria phage fiAA91-ss	V-10	0.100882	1.02752		8.81193e-07	-0.618462	-0.6		-0.0340681	0.745793	0.584394	2.04947e-11	0.933809	6.31237e-11	4.33097e-06
Salmonella phage SPN1S	V-208	0.000224542	0.0039534	Shigella phage Ss-VASD	V-174	0.00343368	0.0145236		1.42073e-07	-0.642926	-0.6		-0.0154552	0.883102	0.627471	2.21372e-13	0.933809	7.00505e-13	7.45883e-07
Salmonella phage SPN1S	V-208	0.000224542	0.0039534	Shigella phage 75/02 Stx	V-169	0.00983623	0.0397033		8.38257e-06	-0.569812	-0.6		-0.0220958	0.83349	0.547717	5.92113e-10	0.933809	1.79971e-09	3.87275e-05
Escherichia virus P2	V-16	0.00303839	0.631405	Escherichia phage TL-2011c	V-173	0.00486971	0.0155185		3.04201e-14	-0.564628	-0.6		0.325981	0.00142909	0.890609	9.44043e-39	0.00569172	1.98249e-37	3.51352e-13
Escherichia virus P2	V-16	0.00303839	0.631405	Yersinia phage L-413C	V-21	0.0103605	0.394923		0	-0.583674	-0.6		0.325981	0.00142909	0.909656	5.18476e-43	0.00569172	1.4971e-41	0
Escherichia virus P2	V-16	0.00303839	0.631405	Escherichia phage pro483	V-14	0.014353	0.526578		2.43872e-12	-0.59028	-0.6		0.264297	0.0104668	0.854578	1.65324e-32	0.033581	2.01e-31	2.16671e-11
Escherichia phage TL-2011c	V-173	0.00486971	0.0155185	Yersinia phage L-413C	V-21	0.0103605	0.394923		0	-0.592055	-0.6		0.325981	0.00142909	0.918037	3.39117e-45	0.00569172	1.3056e-43	0
Yersinia phage L-413C	V-21	0.0103605	0.394923	Escherichia phage pro483	V-14	0.014353	0.526578		1.33227e-15	-0.623862	-0.6		0.264297	0.0104668	0.88816	2.91819e-38	0.033581	5.18539e-37	1.70974e-14
Pseudomonas phage OBP	V-135	2.79619e-05	0.00117447	Shigella phage 75/02 Stx	V-169	0.00983623	0.0397033		7.22098e-09	-0.68915	-0.7		-0.0220958	0.83349	0.667054	1.77317e-15	0.933809	6.50161e-15	4.90602e-08
Salmonella phage SPN1S	V-208	0.000224542	0.0039534	Staphylococcus phage SA1	V-148*	0.00106354	0.00879143		1.66241e-08	-0.67487	-0.7		-0.0154552	0.883102	0.659415	4.76259e-15	0.933809	1.66691e-14	1.06672e-07
Salmonella phage SPN1S	V-208	0.000224542	0.0039534	Enterobacteria phage WPhi	V-12	0.00199478	0.320165		5.14355e-11	-0.740694	-0.7		-0.0108696	0.917639	0.729825	1.50859e-19	0.933809	7.11191e-19	4.09711e-10
Salmonella phage SPN1S	V-208	0.000224542	0.0039534	Escherichia phage TL-2011c	V-173	0.00486971	0.0155185		2.10071e-08	-0.673126	-0.7		-0.0190316	0.856314	0.654094	9.32048e-15	0.933809	3.21348e-14	1.31153e-07
Salmonella phage SPN1S	V-208	0.000224542	0.0039534	Yersinia phage L-413C	V-21	0.0103605	0.394923		6.08745e-10	-0.718389	-0.7		-0.0190316	0.856314	0.699358	1.93004e-17	0.933809	8.10617e-17	4.53613e-09
Salmonella phage SPN1S	V-208	0.000224542	0.0039534	Escherichia phage pro483	V-14	0.014353	0.526578		5.44437e-08	-0.660467	-0.7		-0.0220958	0.83349	0.638372	6.28103e-14	0.933809	2.04355e-13	3.30961e-07
Escherichia phage pro147	V-13	0.000310142	0.494377	Enterobacteria phage fiAA91-ss	V-10	0.100882	1.02752		5.0374e-09	-0.699249	-0.7		-0.0340681	0.745793	0.66518	2.26534e-15	0.933809	8.05066e-15	3.52618e-08
Pseudomonas phage OBP	V-135	2.79619e-05	0.00117447	Staphylococcus phage SA1	V-148*	0.00106354	0.00879143		1.0274e-12	-0.77867	-0.8		-0.0154552	0.883102	0.763215	3.2689e-22	0.933809	1.84175e-21	9.49318e-12
Pseudomonas phage OBP	V-135	2.79619e-05	0.00117447	Shigella phage Ss-VASD	V-174	0.00343368	0.0145236		4.43423e-13	-0.785439	-0.8		-0.0154552	0.883102	0.769984	8.32454e-23	0.933809	4.93069e-22	4.26795e-12
Pseudomonas phage OBP	V-135	2.79619e-05	0.00117447	Escherichia phage TL-2011c	V-173	0.00486971	0.0155185		8.28226e-14	-0.800359	-0.8		-0.0190316	0.856314	0.781327	7.5504e-24	0.933809	4.7139e-23	8.69638e-13
Pseudomonas phage OBP	V-135	2.79619e-05	0.00117447	Yersinia phage L-413C	V-21	0.0103605	0.394923		6.66134e-16	-0.832749	-0.8		-0.0190316	0.856314	0.813718	3.34038e-27	0.933809	2.66079e-26	9.61731e-15
Pseudomonas phage OBP	V-135	2.79619e-05	0.00117447	Escherichia phage pro483	V-14	0.014353	0.526578		2.22327e-11	-0.754936	-0.8		-0.0220958	0.83349	0.73284	9.00489e-20	0.933809	4.42581e-19	1.83419e-10
Escherichia phage pro147	V-13	0.000310142	0.494377	Staphylococcus phage SA1	V-148*	0.00106354	0.00879143		2.22045e-16	-0.835451	-0.8		-0.0154552	0.883102	0.819996	6.27355e-28	0.933809	5.5738e-27	3.41949e-15
Escherichia phage pro147	V-13	0.000310142	0.494377	Shigella phage 75/02 Stx	V-169	0.00983623	0.0397033		4.88498e-15	-0.82171	-0.8		-0.0220958	0.83349	0.799614	1.14732e-25	0.933809	8.28225e-25	5.93911e-14
Pseudomonas phage OBP	V-135	2.79619e-05	0.00117447	Enterobacteria phage WPhi	V-12	0.00199478	0.320165		0	-0.854672	-0.9		-0.0108696	0.917639	0.843803	5.79881e-31	0.933809	6.31646e-30	0
Escherichia phage pro147	V-13	0.000310142	0.494377	Shigella phage Ss-VASD	V-174	0.00343368	0.0145236		0	-0.871853	-0.9		-0.0154552	0.883102	0.856398	8.81111e-33	0.933809	1.13076e-31	0
Escherichia phage pro147	V-13	0.000310142	0.494377	Escherichia phage TL-2011c	V-173	0.00486971	0.0155185		0	-0.93463	-0.9		-0.0190316	0.856314	0.915599	1.54561e-44	0.933809	5.1005e-43	0
Escherichia phage pro147	V-13	0.000310142	0.494377	Escherichia phage pro483	V-14	0.014353	0.526578		0	-0.910707	-0.9		-0.0220958	0.83349	0.888611	2.37497e-38	0.933809	4.57181e-37	0
Escherichia phage pro147	V-13	0.000310142	0.494377	Enterobacteria phage WPhi	V-12	0.00199478	0.320165		0	-0.977248	-1		-0.0108696	0.917639	0.966378	1.56414e-65	0.933809	1.20439e-63	0
Escherichia phage pro147	V-13	0.000310142	0.494377	Yersinia phage L-413C	V-21	0.0103605	0.394923		0	-1.01864	-1		-0.0190316	0.856314	0.999613	7.84098e-170	0.933809	1.81127e-167	0
Bacteroides_sp_1_1_6	B-76	0.0534833	0.710908	Enterobacteria phage If1	V-541	0.0182009	0.4086		5.60751e-12	0.80692	0.8		0.710939	1.41941e-15	-0.0959808	0.318541	2.64011e-14	0.733275	7.6691e-11
Cafeteria roenbergensis virus BV-PW1	V-502	9.19592e-05	0.0153785	Enterobacteria phage mEp235	V-330	0.00503304	0.0183153		1.64999e-11	0.784879	0.8		0.710939	1.41941e-15	-0.0739401	0.442676	2.64011e-14	0.84018	2.13124e-10
Shigella phage Ss-VASD	V-174	0.00343368	0.0145236	Cafeteria roenbergensis virus BV-PW1	V-502	9.19592e-05	0.0153785		6.10867e-11	0.772383	0.8		0.695484	1.02613e-14	-0.0768992	0.424583	1.70411e-13	0.826706	7.28341e-10
Escherichia phage TL-2011c	V-173	0.00486971	0.0155185	Cafeteria roenbergensis virus BV-PW1	V-502	9.19592e-05	0.0153785		3.11634e-07	0.653599	0.7		0.570949	2.29071e-09	-0.0826492	0.390672	2.3156e-08	0.796765	2.1956e-06
Bacteroides_salyersiae	B-74	0.174801	0.0494183	Parabacteroides phage YZ-2015b	V-543	13.9532	5.70924		8.59715e-06	0.595679	0.6		0.470073	1.99364e-06	-0.125606	0.191043	1.44851e-05	0.501892	5.40226e-05
Megamonas_unclassified	B-322	0.032438	0.000235003	uncultured crAssphage	V-567	41.2153	13.7262		1.73372e-05	0.573275	0.6		0.473013	1.68544e-06	-0.100262	0.297331	1.24401e-05	0.7216	0.000104699
Escherichia phage pro483	V-14	0.014353	0.526578	Cafeteria roenbergensis virus BV-PW1	V-502	9.19592e-05	0.0153785		1.80903e-05	0.57137	0.6		0.47506	1.49805e-06	-0.0963101	0.316875	1.12354e-05	0.733275	0.000107846
Shigella phage 75/02 Stx	V-169	0.00983623	0.0397033	Cafeteria roenbergensis virus BV-PW1	V-502	9.19592e-05	0.0153785		2.3351e-05	0.563277	0.6		0.47506	1.49805e-06	-0.088217	0.359433	1.12354e-05	0.788378	0.000135728
Phascolarctobacterium_succinatutens	B-326	0.0651681	2.25455e-05	Cafeteria roenbergensis virus BV-PW1	V-502	9.19592e-05	0.0153785		0.000656204	0.455772	0.5		0.43717	1.17876e-05	-0.0186025	0.847043	7.83033e-05	0.936391	0.00332677
Enterobacteria phage fiAA91-ss	V-10	0.100882	1.02752	Cafeteria roenbergensis virus BV-PW1	V-502	9.19592e-05	0.0153785		0.00136773	0.44502	0.4		0.325539	0.00145187	-0.119481	0.213768	0.0075856	0.552234	0.00655664
Wickerhamomyces ciferrii	F-2	3.77741	15.2627	Cafeteria roenbergensis virus BV-PW1	V-502	9.19592e-05	0.0153785		0.0022435	0.425882	0.4		0.311442	0.00237544	-0.11444	0.233864	0.0118772	0.594245	0.0102277
Yersinia phage L-413C	V-21	0.0103605	0.394923	Parabacteroides phage YZ-2015b	V-543	13.9532	5.70924		0.0109972	0.359492	0.4		0.154309	0.139719	-0.205183	0.0315296	0.467404	0.0977419	0.0452542
Pseudomonas phage OBP	V-135	2.79619e-05	0.00117447	uncultured crAssphage	V-567	41.2153	13.7262		0.0109388	0.357081	0.4		0.0901	0.390401	-0.266981	0.0048099	0.941948	0.0191163	0.0452542
Escherichia phage TL-2011c	V-173	0.00486971	0.0155185	Enterobacteria phage mEp235	V-330	0.00503304	0.0183153		0.00809726	0.181071	0.2		0.802897	3.70859e-22	0.621827	4.16919e-13	1.32654e-20	1.84636e-12	0.0348632
Lactococcus virus Bibb29	V-283	0.531785	0.00317016	Lactococcus phage P680	V-398	0.931422	0.0227585		0.00124215	0.163643	0.2		0.873986	2.87216e-30	0.710343	3.60738e-18	2.22593e-28	2.32977e-17	0.00601665
Lactococcus virus bIL170	V-284	0.294337	0.00922818	Lactococcus virus P008	V-288	0.556084	0.00868702		0.00490181	0.148855	0.1		0.859198	3.17348e-28	0.710343	3.60738e-18	1.84459e-26	2.32977e-17	0.0219168
Lactococcus virus bIL170	V-284	0.294337	0.00922818	Lactococcus phage P680	V-398	0.931422	0.0227585		0	-0.201901	-0.2		0.798099	9.87119e-22	1	0	3.27865e-20	0	0
Enterobacteria phage WPhi	V-12	0.00199478	0.320165	Enterobacteria phage If1	V-541	0.0182009	0.4086		7.06018e-08	-0.219271	-0.2		0.710939	1.41941e-15	0.93021	7.98893e-49	2.64011e-14	4.12762e-47	5.75962e-07
Lactococcus virus P008	V-288	0.556084	0.00868702	Lactococcus virus Bibb29	V-283	0.531785	0.00317016		0	-0.228385	-0.2		0.771615	1.41532e-19	1	0	4.3875e-18	0	0
Staphylococcus phage SA1	V-148	0.00106354	0.00879143	Enterobacteria phage mEp235	V-330	0.00503304	0.0183153		0.00839857	-0.236998	-0.2		0.478025	1.26126e-06	0.715023	1.72399e-18	9.77474e-06	1.1965e-17	0.0358287
Staphylococcus phage SA1	V-148	0.00106354	0.00879143	Enterobacteria phage If1	V-541	0.0182009	0.4086		0.000665355	-0.276342	-0.3		0.5	3.34578e-07	0.776342	2.20599e-23	2.88108e-06	2.09344e-22	0.00332677
Shigella phage Ss-VASD	V-174	0.00343368	0.0145236	Enterobacteria phage If1	V-541	0.0182009	0.4086		9.40358e-05	-0.303318	-0.3		0.5	3.34578e-07	0.803318	4.65958e-26	2.88108e-06	5.55565e-25	0.000526827
Escherichia phage pro483	V-14	0.014353	0.526578	Enterobacteria phage If1	V-541	0.0182009	0.4086		4.45754e-07	-0.455357	-0.5		0.333769	0.00107732	0.789126	1.33219e-24	0.00589357	1.37659e-23	3.09366e-06
Escherichia virus P2	V-16	0.00303839	0.631405	Enterobacteria phage If1	V-541	0.0182009	0.4086		1.71341e-10	-0.466637	-0.5		0.406007	5.3957e-05	0.872644	2.1174e-35	0.000325844	4.28082e-34	1.99184e-09
Wickerhamomyces ciferrii	F-2	3.77741	15.2627	Enterobacteria phage If1	V-541	0.0182009	0.4086		1.52092e-05	-0.467694	-0.5		0.218547	0.0353261	0.686241	1.29804e-16	0.135757	7.64038e-16	9.30563e-05
Bacteroides_salyersiae	B-74	0.174801	0.0494183	uncultured crAssphage	V-567	41.2153	13.7262		0.000727935	-0.474067	-0.5		-0.241359	0.0197706	0.232707	0.0144266	0.079942	0.0498885	0.00356305
Bacteroides_sp_1_1_6	B-76	0.0534833	0.710908	Parabacteroides phage YZ-2015b	V-543	13.9532	5.70924		0.000446599	-0.47855	-0.5		-0.0796747	0.44775	0.398876	1.5874e-05	0.941948	6.59055e-05	0.00231844
Yersinia phage L-413C	V-21	0.0103605	0.394923	Enterobacteria phage If1	V-541	0.0182009	0.4086		5.60885e-13	-0.492034	-0.5		0.406007	5.3957e-05	0.898041	2.59119e-40	0.000325844	7.53065e-39	8.69371e-12
Enterobacteria phage fiAA91-ss	V-10	0.100882	1.02752	Enterobacteria phage If1	V-541	0.0182009	0.4086		4.81338e-07	-0.527626	-0.5		0.199087	0.0557277	0.726713	2.55091e-19	0.207307	1.88281e-18	3.2915e-06
Escherichia phage TL-2011c	V-173	0.00486971	0.0155185	Enterobacteria phage If1	V-541	0.0182009	0.4086		0	-0.550008	-0.6		0.406007	5.3957e-05	0.956015	2.37585e-59	0.000325844	1.84129e-57	0
Shigella phage 75/02 Stx	V-169	0.00983623	0.0397033	Enterobacteria phage If1	V-541	0.0182009	0.4086		0	-0.568597	-0.6		0.349647	0.00059173	0.918244	2.97361e-45	0.00339697	1.38273e-43	0
Enterobacteria phage mEp235	V-330	0.00503304	0.0183153	Enterobacteria phage If1	V-541	0.0182009	0.4086		9.2458e-08	-0.652282	-0.7		-0.0219754	0.834384	0.630307	1.60268e-13	0.941948	7.30633e-13	7.28694e-07
Pseudomonas phage OBP	V-135	2.79619e-05	0.00117447	Enterobacteria phage mEp235	V-330	0.00503304	0.0183153		5.92433e-08	-0.656477	-0.7		-0.0154552	0.883102	0.641022	4.5889e-14	0.941948	2.17739e-13	5.00875e-07
Escherichia virus P2	V-16	0.00303839	0.631405	Enterobacteria phage mEp235	V-330	0.00503304	0.0183153		6.57594e-08	-0.659591	-0.7		-0.0270607	0.796807	0.632531	1.24124e-13	0.941948	5.71461e-13	5.46038e-07
Escherichia phage pro147	V-13	0.000310142	0.494377	Enterobacteria phage mEp235	V-330	0.00503304	0.0183153		3.96946e-08	-0.662432	-0.7		-0.0154552	0.883102	0.646976	2.24147e-14	0.941948	1.07452e-13	3.48264e-07
Yersinia phage L-413C	V-21	0.0103605	0.394923	Enterobacteria phage mEp235	V-330	0.00503304	0.0183153		1.82965e-08	-0.678505	-0.7		-0.0270607	0.796807	0.651444	1.29565e-14	0.941948	6.34187e-14	1.66821e-07
Salmonella phage SPN1S	V-208	0.000224542	0.0039534	Enterobacteria phage mEp235	V-330	0.00503304	0.0183153		1.1264e-08	-0.68022	-0.7		-0.0154552	0.883102	0.664765	2.39123e-15	0.941948	1.24935e-14	1.06893e-07
Enterobacteria phage WPhi	V-12	0.00199478	0.320165	Enterobacteria phage mEp235	V-330	0.00503304	0.0183153		4.85162e-09	-0.691377	-0.7		-0.0154552	0.883102	0.675922	5.42656e-16	0.941948	3.04018e-15	5.01334e-08
Salmonella phage SPN1S	V-208	0.000224542	0.0039534	Enterobacteria phage If1	V-541	0.0182009	0.4086		4.70541e-09	-0.691772	-0.7		-0.0154552	0.883102	0.676317	5.14294e-16	0.941948	2.91643e-15	4.97276e-08
Pseudomonas phage OBP	V-135	2.79619e-05	0.00117447	Enterobacteria phage If1	V-541	0.0182009	0.4086		9.72999e-13	-0.779117	-0.8		-0.0154552	0.883102	0.763662	2.99068e-22	0.941948	2.67436e-21	1.4595e-11
Escherichia phage pro147	V-13	0.000310142	0.494377	Enterobacteria phage If1	V-541	0.0182009	0.4086		0	-0.912083	-0.9		-0.0154552	0.883102	0.896628	5.24159e-40	0.941948	1.43373e-38	0
Groups: NONM - UCM
SOURCE		abundance		TARGET		abundance			p (difference)	(r1-r2)	EVIDENCE		r1	p1	r2	p2	lfdr (in cond. 1)	lfdr (in cond. 2)	lfdr (difference)
Clostridium_citroniae	B-215	0.00241774	0.000637421	Escherichia phage pro483	V-14	0.014353	0.842514		0.0011115	0.550048	0.6		0.422054	2.51193e-05	-0.127994	0.365853	0.000430617	0.770218	0.0266759
Bacteroides phage B40-8	V-302	0.0159469	1.90741	Bacteroides_stercoris	B-81	2.75954	11.1751		0.000820873	0.55196	0.6		0.0757136	0.470715	-0.476246	0.000358615	0.822829	0.00478154	0.0246262
Megamonas_unclassified	B-322	0.032438	0.377453	uncultured crAssphage	V-567	41.2153	6.44445		0.000579493	0.569676	0.6		0.473013	1.68544e-06	-0.0966627	0.495429	3.37087e-05	0.83136	0.0231797
Clostridium_citroniae	B-215	0.00241774	0.000637421	Salmonella phage RE-2010	V-140*	0.134354	2.23197		0.00247929	0.522146	0.5		0.327668	0.00134509	-0.194478	0.167112	0.0131812	0.527724	0.0495859
Erysipelotrichaceae_bacterium_6_1_45	B-305	0.00234775	0.000107115	Bacteroides_sp_4_3_47FAA	B-79	1.63488	0.0332362		8.20005e-07	-0.694053	-0.7		0.0199527	0.84944	0.714006	2.80624e-09	0.917479	1.1225e-07	4.92003e-05
Collinsella_intestinalis	B-22	0.000365484	0.145942	Bacteroides phage B40-8	V-302	0.0159469	1.90741		1.24345e-13	-0.885886	-0.9		-0.0270607	0.796807	0.858825	3.87553e-16	0.917479	4.65064e-14	1.49214e-11
Megamonas_unclassified	0.032438	0.377453	uncultured crAssphage	41.2153	6.44445				0.000579493	0.569676	0.6		0.473013	1.68544e-06	-0.0966627	0.495429	3.37087e-05	0.83136	0.0231797

## Sheet: Table S21_DiffCorrln._fe.&males
Table S21 : Differential Correlations between Microbes in males & females Groups.
Groups: CDM - CDF
SOURCE		abundance		TARGET		abundance			p (difference)	(r1-r2)	EVIDENCE		r1	p1	r2	p2	lfdr (in cond. 1)	lfdr (in cond. 2)	lfdr (difference)
Pseudomonas phage OBP	V-135	0.00117447	5.91875e-05	Enterobacteria phage WPhi	V-12	0.320165	0.00278622		1.7808e-13	0.862671	0.9		0.843803	5.79881e-31	-0.0188679	0.892281	1.58501e-29	0.898858	1.1147e-12
Rhodococcus phage RGL3	V-246	0.00511389	0.000258776	Enterobacteria phage WPhi	V-12	0.320165	0.00278622		3.23963e-13	0.858689	0.9		0.839821	2.018e-30	-0.0188679	0.892281	5.17112e-29	0.898858	2.0125e-12
Erwinia phage ENT90	V-112	0.0516642	0.000244323	Enterobacteria phage WPhi	V-12	0.320165	0.00278622		0	0.930133	0.9		0.911266	2.05158e-43	-0.0188679	0.892281	1.86921e-41	0.898858	0
Erwinia phage ENT90	V-112	0.0516642	0.000244323	Yersinia phage L-413C	V-21	0.394923	0.0165691		2.22045e-16	0.898051	0.9		0.879183	1.47284e-36	-0.0188679	0.892281	6.35646e-35	0.898858	1.44505e-15
Erwinia phage ENT90	V-112	0.0516642	0.000244323	Escherichia virus P2	V-16	0.631405	0.0780385		7.10543e-15	0.888016	0.9		0.861082	1.67553e-33	-0.0269338	0.846703	6.24516e-32	0.898858	4.51663e-14
Pseudomonas phage OBP	V-135	0.00117447	5.91875e-05	Yersinia phage L-413C	V-21	0.394923	0.0165691		1.05764e-11	0.832586	0.8		0.813718	3.34038e-27	-0.0188679	0.892281	7.02336e-26	0.898858	6.47214e-11
Pseudomonas phage OBP	V-135	0.00117447	5.91875e-05	Escherichia virus P2	V-16	0.631405	0.0780385		8.40568e-11	0.81936	0.8		0.792426	6.25279e-25	-0.0269338	0.846703	1.04639e-23	0.898858	4.99468e-10
Rhodococcus phage RGL3	V-246	0.00511389	0.000258776	Yersinia phage L-413C	V-21	0.394923	0.0165691		1.6473e-11	0.828865	0.8		0.809997	8.73633e-27	-0.0188679	0.892281	1.74727e-25	0.898858	1.00058e-10
Rhodococcus phage RGL3	V-246	0.00511389	0.000258776	Escherichia virus P2	V-16	0.631405	0.0780385		5.30123e-11	0.823692	0.8		0.796758	2.26871e-25	-0.0269338	0.846703	3.99695e-24	0.898858	3.19633e-10
Enterobacteria phage phi80	V-335	0.0635547	0.0195707	Enterobacteria phage WPhi	V-12	0.320165	0.00278622		1.31774e-08	0.762245	0.8		0.735311	5.86909e-20	-0.0269338	0.846703	7.40408e-19	0.898858	7.25197e-08
Enterobacteria phage phi80	V-335	0.0635547	0.0195707	Escherichia virus P2	V-16	0.631405	0.0780385		3.22827e-09	0.78662	0.8		0.748172	5.83888e-21	-0.0384478	0.78253	7.97981e-20	0.898858	1.85117e-08
Salmonella phage STML-198	V-34	0.00194662	0.000164983	Enterobacteria phage WPhi	V-12	0.320165	0.00278622		1.74027e-06	0.679949	0.7		0.661081	3.84843e-15	-0.0188679	0.892281	2.94926e-14	0.898858	8.70133e-06
Salmonella phage STML-198	V-34	0.00194662	0.000164983	Yersinia phage L-413C	V-21	0.394923	0.0165691		5.62869e-06	0.656174	0.7		0.637307	7.1194e-14	-0.0188679	0.892281	4.63326e-13	0.898858	2.69914e-05
Salmonella phage STML-198	V-34	0.00194662	0.000164983	Escherichia virus P2	V-16	0.631405	0.0780385		8.40936e-06	0.650626	0.7		0.623692	3.38684e-13	-0.0269338	0.846703	1.98372e-12	0.898858	3.96303e-05
Escherichia phage phi191	V-172	0.00305492	0.000157793	Lachnospiraceae_bacterium_6_1_63FAA	B-259	0.0582086	3.61161e-05		5.27802e-08	0.738593	0.7		0.719725	8.08755e-19	-0.0188679	0.892281	9.08464e-18	0.898858	2.83118e-07
Escherichia phage P13374	V-197	0.00430589	0.000257007	Lachnospiraceae_bacterium_6_1_63FAA	B-259	0.0582086	3.61161e-05		4.3746e-08	0.741316	0.7		0.722448	5.18034e-19	-0.0188679	0.892281	5.98293e-18	0.898858	2.37561e-07
Escherichia phage P13374	V-197	0.00430589	0.000257007	Enterobacteria phage WPhi	V-12	0.320165	0.00278622		2.45971e-08	0.749437	0.7		0.730569	1.32913e-19	-0.0188679	0.892281	1.60278e-18	0.898858	1.34464e-07
Escherichia phage P13374	V-197	0.00430589	0.000257007	Yersinia phage L-413C	V-21	0.394923	0.0165691		8.81815e-08	0.730949	0.7		0.712082	2.74667e-18	-0.0188679	0.892281	2.85098e-17	0.898858	4.69538e-07
Escherichia phage P13374	V-197	0.00430589	0.000257007	Escherichia virus P2	V-16	0.631405	0.0780385		1.77329e-07	0.723997	0.7		0.697063	2.71384e-17	-0.0269338	0.846703	2.50039e-16	0.898858	9.14528e-07
Erwinia phage ENT90	V-112	0.0516642	0.000244323	Lachnospiraceae_bacterium_6_1_63FAA	B-259	0.0582086	3.61161e-05		2.9148e-06	0.669799	0.7		0.650931	1.38056e-14	-0.0188679	0.892281	9.93036e-14	0.898858	1.43122e-05
Enterobacteria phage phi80	V-335	0.0635547	0.0195707	Yersinia phage L-413C	V-21	0.394923	0.0165691		1.16207e-07	0.730732	0.7		0.703798	9.88918e-18	-0.0269338	0.846703	9.42922e-17	0.898858	6.06943e-07
Shigella phage Shfl2	V-51	0.0012833	0.000120929	Enterobacteria phage WPhi	V-12	0.320165	0.00278622		4.43308e-05	0.607779	0.6		0.588911	1.31506e-11	-0.0188679	0.892281	6.30615e-11	0.898858	0.000197561
Shigella phage Shfl2	V-51	0.0012833	0.000120929	Yersinia phage L-413C	V-21	0.394923	0.0165691		0.000110142	0.583185	0.6		0.564317	1.35948e-10	-0.0188679	0.892281	5.71681e-10	0.898858	0.000458461
Shigella phage Shfl2	V-51	0.0012833	0.000120929	Escherichia virus P2	V-16	0.631405	0.0780385		0.000126623	0.581716	0.6		0.554782	3.19678e-10	-0.0269338	0.846703	1.27871e-09	0.898858	0.000511483
Escherichia phage phi191	V-172	0.00305492	0.000157793	Enterobacteria phage WPhi	V-12	0.320165	0.00278622		8.21488e-06	0.647982	0.6		0.629114	1.83655e-13	-0.0188679	0.892281	1.12386e-12	0.898858	3.89376e-05
Escherichia phage phi191	V-172	0.00305492	0.000157793	Yersinia phage L-413C	V-21	0.394923	0.0165691		1.66784e-05	0.631862	0.6		0.612994	1.09481e-12	-0.0188679	0.892281	6.02514e-12	0.898858	7.77061e-05
Escherichia phage phi191	V-172	0.00305492	0.000157793	Escherichia virus P2	V-16	0.631405	0.0780385		2.24907e-05	0.627666	0.6		0.600732	3.98374e-12	-0.0269338	0.846703	2.04167e-11	0.898858	0.000103609
Rhodococcus phage RGL3	V-246	0.00511389	0.000258776	Lachnospiraceae_bacterium_6_1_63FAA	B-259	0.0582086	3.61161e-05		2.13934e-05	0.62594	0.6		0.607072	2.05723e-12	-0.0188679	0.892281	1.08834e-11	0.898858	9.91108e-05
Vibrio phage pYD38-A	V-536	0.00671181	0.0001519	Lachnospiraceae_bacterium_6_1_63FAA	B-259	0.0582086	3.61161e-05		4.00064e-05	0.610415	0.6		0.591547	1.01181e-11	-0.0188679	0.892281	4.88047e-11	0.898858	0.000180249
Vibrio phage pYD38-A	V-536	0.00671181	0.0001519	Enterobacteria phage WPhi	V-12	0.320165	0.00278622		2.64298e-05	0.6208	0.6		0.601932	3.51922e-12	-0.0188679	0.892281	1.81494e-11	0.898858	0.000121075
Vibrio phage pYD38-A	V-536	0.00671181	0.0001519	Yersinia phage L-413C	V-21	0.394923	0.0165691		6.0412e-05	0.599666	0.6		0.580798	2.90371e-11	-0.0188679	0.892281	1.34995e-10	0.898858	0.000262105
Vibrio phage pYD38-A	V-536	0.00671181	0.0001519	Escherichia virus P2	V-16	0.631405	0.0780385		6.59392e-05	0.599996	0.6		0.573062	6.05683e-11	-0.0269338	0.846703	2.69924e-10	0.898858	0.00028309
Escherichia phage TL-2011c	V-173	0.0155185	0.00562618	Escherichia virus P2	V-16	0.631405	0.0780385		1.23702e-10	0.572136	0.6		0.890609	9.44043e-39	0.318473	0.0189253	5.5294e-37	0.0488012	7.29755e-10
Enterobacteria phage HK106	V-320	0.0154295	0.00247732	Enterobacteria phage WPhi	V-12	0.320165	0.00278622		2.9112e-05	0.618416	0.6		0.599548	4.50004e-12	-0.0188679	0.892281	2.2778e-11	0.898858	0.000132621
Enterobacteria phage HK106	V-320	0.0154295	0.00247732	Yersinia phage L-413C	V-21	0.394923	0.0165691		6.12698e-05	0.59929	0.6		0.580422	3.01057e-11	-0.0188679	0.892281	1.38689e-10	0.898858	0.000264428
Enterobacteria phage HK106	V-320	0.0154295	0.00247732	Escherichia virus P2	V-16	0.631405	0.0780385		0.000123079	0.582537	0.6		0.555603	2.97304e-10	-0.0269338	0.846703	1.19504e-09	0.898858	0.000499629
Enterobacterial phage mEp213	V-337	0.0273669	0.00435668	Enterobacteria phage WPhi	V-12	0.320165	0.00278622		0.000175898	0.569611	0.6		0.550743	4.55496e-10	-0.0188679	0.892281	1.76183e-09	0.898858	0.000693443
Enterobacteria phage phi80	V-335	0.0635547	0.0195707	Lachnospiraceae_bacterium_6_1_63FAA	B-259	0.0582086	3.61161e-05		4.88073e-05	0.608029	0.6		0.581096	2.82156e-11	-0.0269338	0.846703	1.3221e-10	0.898858	0.000215172
Enterobacteria phage phi80	V-335	0.0635547	0.0195707	Escherichia phage pro483	V-14	0.526578	0.158456		5.28257e-08	0.634521	0.6		0.796717	2.29093e-25	0.162196	0.241284	3.99695e-24	0.454833	2.83118e-07
Enterobacteria phage WPhi	V-12	0.320165	0.00278622	Escherichia phage pro483	V-14	0.526578	0.158456		6.14067e-09	0.566844	0.6		0.859188	3.30211e-33	0.292344	0.0319434	1.17727e-31	0.0746256	3.44887e-08
Yersinia phage L-413C	V-21	0.394923	0.0165691	Escherichia phage pro483	V-14	0.526578	0.158456		6.35234e-11	0.595816	0.6		0.88816	2.91819e-38	0.292344	0.0319434	1.49557e-36	0.0746256	3.80213e-10
Escherichia virus P2	V-16	0.631405	0.0780385	Wickerhamomyces ciferrii	F-2	15.2627	4.90711		3.51431e-06	0.583054	0.6		0.737452	4.03462e-20	0.154398	0.264962	5.25141e-19	0.481046	1.71532e-05
Aeromonas virus Aeh1	V-41	0.000142658	1.89259e-05	Enterobacteria phage WPhi	V-12	0.320165	0.00278622		0.000391919	0.544737	0.5		0.525869	3.64748e-09	-0.0188679	0.892281	1.29478e-08	0.898858	0.00148784
Aeromonas virus Aeh1	V-41	0.000142658	1.89259e-05	Yersinia phage L-413C	V-21	0.394923	0.0165691		0.000852328	0.51837	0.5		0.499502	2.77572e-08	-0.0188679	0.892281	8.99641e-08	0.898858	0.00299961
Aeromonas virus Aeh1	V-41	0.000142658	1.89259e-05	Escherichia virus P2	V-16	0.631405	0.0780385		0.000834997	0.521089	0.5		0.494156	4.10368e-08	-0.0269338	0.846703	1.29424e-07	0.898858	0.00295128
Pseudomonas phage OBP	V-135	0.00117447	5.91875e-05	Lachnospiraceae_bacterium_6_1_63FAA	B-259	0.0582086	3.61161e-05		0.000620135	0.529453	0.5		0.510585	1.20785e-08	-0.0188679	0.892281	4.04259e-08	0.898858	0.00223031
Pseudomonas phage OBP	V-135	0.00117447	5.91875e-05	Escherichia phage pro483	V-14	0.526578	0.158456		0.000135924	0.454757	0.5		0.73284	9.00489e-20	0.278083	0.0417481	1.11879e-18	0.0927736	0.000546361
Salmonella phage STML-198	V-34	0.00194662	0.000164983	Lachnospiraceae_bacterium_6_1_63FAA	B-259	0.0582086	3.61161e-05		0.000916429	0.515784	0.5		0.496916	3.35637e-08	-0.0188679	0.892281	1.07091e-07	0.898858	0.00319775
Rhodococcus phage RGL3	V-246	0.00511389	0.000258776	Escherichia phage pro483	V-14	0.526578	0.158456		0.000137367	0.454551	0.5		0.732635	9.32925e-20	0.278083	0.0417481	1.14179e-18	0.0927736	0.000549467
Cronobacter phage phiES15	V-316	0.00540526	0.000110426	Enterobacteria phage WPhi	V-12	0.320165	0.00278622		0.000510306	0.536044	0.5		0.517176	7.25951e-09	-0.0188679	0.892281	2.49071e-08	0.898858	0.00185978
Cronobacter phage phiES15	V-316	0.00540526	0.000110426	Yersinia phage L-413C	V-21	0.394923	0.0165691		0.00100862	0.512331	0.5		0.493463	4.3149e-08	-0.0188679	0.892281	1.35564e-07	0.898858	0.00350452
Cronobacter phage phiES15	V-316	0.00540526	0.000110426	Escherichia virus P2	V-16	0.631405	0.0780385		0.00103027	0.51349	0.5		0.486557	7.07232e-08	-0.0269338	0.846703	2.14789e-07	0.898858	0.00356463
Enterobacteria phage Phi1	V-33	0.00368588	0.0665533	Parabacteroides phage YZ-2015b	V-543	5.70924	23.6646		0.00137795	0.53046	0.5		0.226512	0.0173338	-0.303949	0.0254535	0.031727	0.0610288	0.00464987
Enterobacteria phage Phi1	V-33	0.00368588	0.0665533	Bacteroides phage B124-14	V-301	17.2391	4.45989		0.00434695	0.454875	0.5		0.0227575	0.813443	-0.432118	0.0011027	0.845404	0.00300402	0.0133502
Enterobacteria phage 9g	V-252*	0.00762045	0.00014862	Enterobacteria phage WPhi	V-12	0.320165	0.00278622		0.00106267	0.510433	0.5		0.491565	4.94776e-08	-0.0188679	0.892281	1.52525e-07	0.898858	0.00366129
Enterobacteria phage 9g	V-252*	0.00762045	0.00014862	Yersinia phage L-413C	V-21	0.394923	0.0165691		0.00197391	0.486956	0.5		0.468089	2.5162e-07	-0.0188679	0.892281	7.13938e-07	0.898858	0.00642306
Enterobacteria phage 9g	V-252*	0.00762045	0.00014862	Escherichia virus P2	V-16	0.631405	0.0780385		0.00221458	0.484093	0.5		0.457159	5.15215e-07	-0.0269338	0.846703	1.42248e-06	0.898858	0.0071214
Escherichia phage TL-2011c	V-173	0.0155185	0.00562618	Enterobacteria phage WPhi	V-12	0.320165	0.00278622		7.28306e-14	0.453516	0.5		0.948414	1.06263e-55	0.494898	0.000142243	2.17839e-53	0.000488031	4.59393e-13
Enterobacterial phage mEp213	V-337	0.0273669	0.00435668	Lachnospiraceae_bacterium_6_1_63FAA	B-259	0.0582086	3.61161e-05		0.000457187	0.539696	0.5		0.520828	5.44956e-09	-0.0188679	0.892281	1.8855e-08	0.898858	0.00169443
Enterobacterial phage mEp213	V-337	0.0273669	0.00435668	Yersinia phage L-413C	V-21	0.394923	0.0165691		0.000408858	0.543361	0.5		0.524493	4.07259e-09	-0.0188679	0.892281	1.43945e-08	0.898858	0.00154499
Enterobacterial phage mEp213	V-337	0.0273669	0.00435668	Escherichia virus P2	V-16	0.631405	0.0780385		0.000477504	0.540405	0.5		0.513471	9.67768e-09	-0.0269338	0.846703	3.27921e-08	0.898858	0.00175584
Shigella phage 75/02 Stx	V-169	0.0397033	0.0112888	Escherichia phage pro483	V-14	0.526578	0.158456		1.5713e-06	0.545488	0.5		0.786978	2.16361e-24	0.24149	0.0785438	3.47875e-23	0.170838	7.9047e-06
Erwinia phage ENT90	V-112	0.0516642	0.000244323	Escherichia phage pro483	V-14	0.526578	0.158456		2.69958e-06	0.516616	0.5		0.7947	3.68431e-25	0.278083	0.0417481	6.29404e-24	0.0927736	1.33353e-05
Enterobacteria phage phi80	V-335	0.0635547	0.0195707	Wickerhamomyces ciferrii	F-2	15.2627	4.90711		0.000103095	0.510478	0.5		0.68336	1.9467e-16	0.172882	0.211252	1.64566e-15	0.405683	0.000431317
Ruminococcus_sp_5_1_39BFAA	B-289	0.106902	0.01016	Lactococcus phage 50101	V-382	0.851011	0.0168807		0.00473781	0.453908	0.5		0.415092	6.51479e-06	-0.0388155	0.780502	1.64373e-05	0.898858	0.0143889
Streptococcus phage SpSL1	V-458	0.481889	0.010631	Alistipes_putredinis	B-47	1.82585	4.91898		0.00434267	0.475426	0.5		0.203798	0.0327201	-0.271628	0.0469364	0.0578243	0.103185	0.0133502
Pseudomonas phage OBP	V-135	0.00117447	5.91875e-05	Anaerostipes_unclassified	B-197	0.0212401	0.00502588		0.0141666	0.397557	0.4		0.378689	4.51603e-05	-0.0188679	0.892281	0.000105503	0.898858	0.0384657
Salmonella phage STML-198	V-34	0.00194662	0.000164983	Escherichia phage pro483	V-14	0.526578	0.158456		0.00696418	0.353943	0.4		0.632026	1.31559e-13	0.278083	0.0417481	8.23497e-13	0.0927736	0.0201078
Bacteroides_gallinarum	B-67	0.000862545	0.0924803	Escherichia phage phi191	V-172	0.00305492	0.000157793		0.00671468	0.438551	0.4		0.394739	1.9777e-05	-0.043812	0.753089	4.72802e-05	0.898858	0.0195944
Bacteroides_gallinarum	B-67	0.000862545	0.0924803	Vibrio phage pYD38-A	V-536	0.00671181	0.0001519		0.00570579	0.446216	0.4		0.402404	1.31291e-05	-0.043812	0.753089	3.19463e-05	0.898858	0.0168908
Escherichia phage phi191	V-172	0.00305492	0.000157793	Anaerostipes_unclassified	B-197	0.0212401	0.00502588		0.00882197	0.421471	0.4		0.402603	1.29884e-05	-0.0188679	0.892281	3.16978e-05	0.898858	0.024774
Escherichia phage P13374	V-197	0.00430589	0.000257007	Escherichia phage pro483	V-14	0.526578	0.158456		0.00535511	0.362681	0.4		0.640764	4.73196e-14	0.278083	0.0417481	3.15464e-13	0.0927736	0.0160849
Cronobacter phage phiES15	V-316	0.00540526	0.000110426	Anaerostipes_unclassified	B-197	0.0212401	0.00502588		0.0170572	0.38767	0.4		0.368802	7.35375e-05	-0.0188679	0.892281	0.00016891	0.898858	0.045119
Cronobacter phage phiES15	V-316	0.00540526	0.000110426	Lachnospiraceae_bacterium_6_1_63FAA	B-259	0.0582086	3.61161e-05		0.00902451	0.420365	0.4		0.401497	1.37885e-05	-0.0188679	0.892281	3.32545e-05	0.898858	0.0252563
Vibrio phage pYD38-A	V-536	0.00671181	0.0001519	Anaerostipes_unclassified	B-197	0.0212401	0.00502588		0.00828044	0.424538	0.4		0.40567	1.09924e-05	-0.0188679	0.892281	2.72319e-05	0.898858	0.0234778
Shigella phage Ss-VASD	V-174	0.0145236	0.00130677	Escherichia phage pro483	V-14	0.526578	0.158456		7.18454e-06	0.425132	0.4		0.83246	1.85506e-29	0.407329	0.00223589	4.60955e-28	0.00599161	3.42519e-05
Shigella phage Ss-VASD	V-174	0.0145236	0.00130677	Escherichia virus P2	V-16	0.631405	0.0780385		1.24165e-08	0.423344	0.4		0.903764	1.33854e-41	0.48042	0.000236342	9.14672e-40	0.000791023	6.87943e-08
Escherichia phage TL-2011c	V-173	0.0155185	0.00562618	Erwinia phage ENT90	V-112	0.0516642	0.000244323		5.76067e-05	0.370357	0.4		0.826439	1.05272e-28	0.456082	0.000528298	2.39787e-27	0.00146849	0.000252607
Escherichia phage TL-2011c	V-173	0.0155185	0.00562618	Enterobacteria phage phi80	V-335	0.0635547	0.0195707		0.00243748	0.376149	0.4		0.680513	2.89223e-16	0.304364	0.0252435	2.39559e-15	0.0608813	0.00780754
Escherichia phage TL-2011c	V-173	0.0155185	0.00562618	Yersinia phage L-413C	V-21	0.394923	0.0165691		1.23268e-09	0.423139	0.4		0.918037	3.39117e-45	0.494898	0.000142243	4.6346e-43	0.000488031	7.1183e-09
Escherichia phage TL-2011c	V-173	0.0155185	0.00562618	Escherichia phage pro483	V-14	0.526578	0.158456		8.41926e-05	0.383061	0.4		0.808929	1.14702e-26	0.425867	0.00132451	2.23941e-25	0.0035727	0.000355866
Escherichia phage TL-2011c	V-173	0.0155185	0.00562618	Escherichia phage pro147	V-13	0.494377	0.105611		9.45409e-09	0.389776	0.4		0.915599	1.54561e-44	0.525823	4.44174e-05	1.58425e-42	0.000159049	5.27371e-08
Enterobacteria phage HK106	V-320	0.0154295	0.00247732	Escherichia phage pro483	V-14	0.526578	0.158456		0.00449776	0.368273	0.4		0.646356	2.41689e-14	0.278083	0.0417481	1.65154e-13	0.0927736	0.0137618
Enterobacterial phage mEp213	V-337	0.0273669	0.00435668	Escherichia phage pro483	V-14	0.526578	0.158456		0.00416258	0.370704	0.4		0.648788	1.79684e-14	0.278083	0.0417481	1.25932e-13	0.0927736	0.0129784
Shigella phage 75/02 Stx	V-169	0.0397033	0.0112888	Escherichia virus P2	V-16	0.631405	0.0780385		4.56616e-05	0.445365	0.4		0.777433	1.74878e-23	0.332068	0.0141612	2.65556e-22	0.0368641	0.000202392
Salmonella phage SE2	V-217	0.0258604	0.000176406	Escherichia virus P2	V-16	0.631405	0.0780385		0.00833174	0.42554	0.4		0.398606	1.61047e-05	-0.0269338	0.846703	3.87268e-05	0.898858	0.0234778
Enterobacteria phage WPhi	V-12	0.320165	0.00278622	Escherichia phage pro147	V-13	0.494377	0.105611		2.22045e-16	0.4003	0.4		0.966378	1.56414e-65	0.566078	8.14966e-06	4.27532e-63	3.19747e-05	1.44505e-15
Enterobacteria phage WPhi	V-12	0.320165	0.00278622	Wickerhamomyces ciferrii	F-2	15.2627	4.90711		0.00197049	0.383873	0.4		0.683544	1.89726e-16	0.299671	0.0277034	1.62058e-15	0.0656556	0.00642306
Yersinia phage L-413C	V-21	0.394923	0.0165691	Escherichia phage pro147	V-13	0.494377	0.105611		0	0.433535	0.4		0.999613	7.84098e-170	0.566078	8.14966e-06	6.4296e-167	3.19747e-05	0
Yersinia phage L-413C	V-21	0.394923	0.0165691	Wickerhamomyces ciferrii	F-2	15.2627	4.90711		0.00552	0.353808	0.4		0.653479	1.00636e-14	0.299671	0.0277034	7.43436e-14	0.0656556	0.0165197
Escherichia phage pro483	V-14	0.526578	0.158456	Escherichia virus P2	V-16	0.631405	0.0780385		1.03012e-05	0.375057	0.4		0.854578	1.65324e-32	0.479521	0.000243735	5.02096e-31	0.000812451	4.82686e-05
Pseudomonas phage phiKZ	V-67	1.37487	0.404007	Lactococcus phage 50101	V-382	0.851011	0.0168807		0.00832623	0.441393	0.4		0.200833	0.035398	-0.24056	0.0797364	0.0624222	0.172973	0.0234778
Parabacteroides phage YZ-2015b	V-543	5.70924	23.6646	Wickerhamomyces ciferrii	F-2	15.2627	4.90711		0.0149561	0.379971	0.4		-0.0680599	0.479887	-0.448031	0.000680541	0.577838	0.00188528	0.0402097
Pseudomonas phage OBP	V-135	0.00117447	5.91875e-05	Escherichia phage TL-2011c	V-173	0.0155185	0.00562618		0.00107547	0.325245	0.3		0.781327	7.5504e-24	0.456082	0.000528298	1.16818e-22	0.00146849	0.00368991
Pseudomonas phage OBP	V-135	0.00117447	5.91875e-05	Escherichia phage pro147	V-13	0.494377	0.105611		0.00177943	0.27099	0.3		0.814869	2.47011e-27	0.543879	2.13269e-05	5.33025e-26	7.67022e-05	0.00585998
Pseudomonas phage OBP	V-135	0.00117447	5.91875e-05	Wickerhamomyces ciferrii	F-2	15.2627	4.90711		0.0124469	0.322161	0.3		0.633584	1.09898e-13	0.311423	0.0218906	7.04036e-13	0.0537434	0.0343652
Rhodococcus phage RGL3	V-246	0.00511389	0.000258776	Escherichia phage TL-2011c	V-173	0.0155185	0.00562618		0.00427458	0.296342	0.3		0.752425	2.63948e-21	0.456082	0.000528298	3.66843e-20	0.00146849	0.0132771
Rhodococcus phage RGL3	V-246	0.00511389	0.000258776	Escherichia phage pro147	V-13	0.494377	0.105611		0.00220367	0.26733	0.3		0.811209	6.40293e-27	0.543879	2.13269e-05	1.3126e-25	7.67022e-05	0.00711419
Enterobacteria phage mEp235	V-330	0.0183153	0.0024515	Escherichia phage pro483	V-14	0.526578	0.158456		0.00164843	0.340462	0.3		0.747791	6.26473e-21	0.407329	0.00223589	8.42144e-20	0.00599161	0.00549475
Shigella phage 75/02 Stx	V-169	0.0397033	0.0112888	Enterobacteria phage phi80	V-335	0.0635547	0.0195707		0.0105636	0.325545	0.3		0.644017	3.20647e-14	0.318473	0.0189253	2.17298e-13	0.0488012	0.0293632
Shigella phage 75/02 Stx	V-169	0.0397033	0.0112888	Enterobacteria phage WPhi	V-12	0.320165	0.00278622		0.000272085	0.315661	0.3		0.829967	3.8386e-29	0.514306	6.9426e-05	9.25781e-28	0.000242252	0.00105739
Shigella phage 75/02 Stx	V-169	0.0397033	0.0112888	Yersinia phage L-413C	V-21	0.394923	0.0165691		0.001687	0.287245	0.3		0.801551	7.17994e-26	0.514306	6.9426e-05	1.3692e-24	0.000242252	0.00560058
Shigella phage 75/02 Stx	V-169	0.0397033	0.0112888	Escherichia phage pro147	V-13	0.494377	0.105611		0.00464276	0.25138	0.3		0.799614	1.14732e-25	0.548234	1.77541e-05	2.09068e-24	6.86715e-05	0.0141526
Erwinia phage ENT90	V-112	0.0516642	0.000244323	Escherichia phage pro147	V-13	0.494377	0.105611		4.68149e-06	0.339012	0.3		0.882891	3.03184e-37	0.543879	2.13269e-05	1.38117e-35	7.67022e-05	2.25813e-05
Enterobacteria phage phi80	V-335	0.0635547	0.0195707	Escherichia phage pro147	V-13	0.494377	0.105611		0.00432474	0.332528	0.3		0.704582	8.7774e-18	0.372054	0.00560106	8.46761e-17	0.0147681	0.0133502
Lachnospiraceae_bacterium_6_1_63FAA	B-259	0.0582086	3.61161e-05	Escherichia phage pro483	V-14	0.526578	0.158456		0.0179349	0.314483	0.3		0.606827	2.11095e-12	0.292344	0.0319434	1.1096e-11	0.0746256	0.0472882
Enterobacteria phage WPhi	V-12	0.320165	0.00278622	Escherichia virus P2	V-16	0.631405	0.0780385		8.92843e-08	0.254765	0.3		0.941578	7.33676e-53	0.686813	9.79634e-09	1.20323e-50	4.03668e-08	4.72343e-07
Escherichia phage pro483	V-14	0.526578	0.158456	Escherichia phage pro147	V-13	0.494377	0.105611		4.26807e-06	0.328552	0.3		0.888611	2.37497e-38	0.560059	1.06512e-05	1.29832e-36	4.13932e-05	2.0709e-05
Escherichia phage pro147	V-13	0.494377	0.105611	Wickerhamomyces ciferrii	F-2	15.2627	4.90711		0.00650367	0.346189	0.3		0.652296	1.16597e-14	0.306106	0.0243782	8.53659e-14	0.0594944	0.0190465
Pseudomonas phage phiKZ	V-67	1.37487	0.404007	Bacteroides phage B124-14	V-301	17.2391	4.45989		0.0133095	0.29917	0.3		0.669766	1.23978e-15	0.370596	0.00580553	1.00656e-14	0.0152581	0.0362584
Shigella phage Ss-VASD	V-174	0.0145236	0.00130677	Escherichia phage TL-2011c	V-173	0.0155185	0.00562618		0.0170124	0.164415	0.2		0.843687	6.01568e-31	0.679272	1.63523e-08	1.59124e-29	6.67109e-08	0.045119
Shigella phage Ss-VASD	V-174	0.0145236	0.00130677	Enterobacteria phage WPhi	V-12	0.320165	0.00278622		0.00285719	0.172103	0.2		0.88585	8.25917e-38	0.713746	1.37722e-09	3.98383e-36	7.23922e-09	0.00904592
Escherichia phage TL-2011c	V-173	0.0155185	0.00562618	Shigella phage 75/02 Stx	V-169	0.0397033	0.0112888		0.00562528	0.16626	0.2		0.875779	6.01165e-36	0.709519	1.90127e-09	2.46478e-34	9.9302e-09	0.0167128
Enterobacteria phage mEp235	V-330	0.0183153	0.0024515	Enterobacterial phage mEp213	V-337	0.0273669	0.00435668		0.00910871	0.171173	0.2		0.857985	5.05354e-33	0.686813	9.79634e-09	1.72662e-31	4.03668e-08	0.0254052
Yersinia phage L-413C	V-21	0.394923	0.0165691	Escherichia virus P2	V-16	0.631405	0.0780385		5.87898e-05	0.222843	0.2		0.909656	5.18476e-43	0.686813	9.79634e-09	4.25151e-41	4.03668e-08	0.000256423
Shigella phage Ss-VASD	V-174	0.0145236	0.00130677	Yersinia phage L-413C	V-21	0.394923	0.0165691		0.0165778	0.148611	0.1		0.862357	1.05515e-33	0.713746	1.37722e-09	4.1201e-32	7.23922e-09	0.0441356
Enterobacteria phage WPhi	V-12	0.320165	0.00278622	Yersinia phage L-413C	V-21	0.394923	0.0165691		0.000446873	-0.0326516	0		0.967348	3.3021e-66	1	0	1.35386e-63	0	0.00166562
Aeromonas virus Aeh1	V-41	0.000142658	1.89259e-05	Shigella phage Shfl2	V-51	0.0012833	0.000120929		4.67826e-12	-0.100421	-0.1		0.899579	1.18904e-40	1	0	7.5001e-39	0	2.88434e-11
Escherichia phage phi191	V-172	0.00305492	0.000157793	Escherichia phage P13374	V-197	0.00430589	0.000257007		1.11022e-15	-0.142842	-0.1		0.857158	6.75878e-33	1	0	2.21688e-31	0	7.11237e-15
Rhodococcus phage RGL3	V-246	0.00511389	0.000258776	Escherichia phage P13374	V-197	0.00430589	0.000257007		6.66134e-16	-0.146325	-0.1		0.853675	2.25129e-32	1	0	6.59305e-31	0	4.30102e-15
Rhodococcus phage RGL3	V-246	0.00511389	0.000258776	Erwinia phage ENT90	V-112	0.0516642	0.000244323		1.80029e-10	-0.0843408	-0.1		0.915659	1.48919e-44	1	0	1.58425e-42	0	1.05446e-09
Aeromonas virus Aeh1	V-41	0.000142658	1.89259e-05	Enterobacteria phage 9g	V-252*	0.00762045	0.00014862		0	-0.213878	-0.2		0.786122	2.62108e-24	1	0	4.13323e-23	0	0
Pseudomonas phage OBP	V-135	0.00117447	5.91875e-05	Salmonella phage STML-198	V-34	0.00194662	0.000164983		0	-0.234214	-0.2		0.765786	1.95487e-22	1	0	2.76378e-21	0	0
Pseudomonas phage OBP	V-135	0.00117447	5.91875e-05	Rhodococcus phage RGL3	V-246	0.00511389	0.000258776		0	-0.23372	-0.2		0.76628	1.76983e-22	1	0	2.54607e-21	0	0
Pseudomonas phage OBP	V-135	0.00117447	5.91875e-05	Erwinia phage ENT90	V-112	0.0516642	0.000244323		2.22045e-16	-0.152666	-0.2		0.847334	1.86277e-31	1	0	5.26714e-30	0	1.44505e-15
Salmonella phage STML-198	V-34	0.00194662	0.000164983	Rhodococcus phage RGL3	V-246	0.00511389	0.000258776		0	-0.208833	-0.2		0.791167	8.35861e-25	1	0	1.37081e-23	0	0
Escherichia phage phi191	V-172	0.00305492	0.000157793	Vibrio phage pYD38-A	V-536	0.00671181	0.0001519		0	-0.180017	-0.2		0.819983	6.29702e-28	1	0	1.39556e-26	0	0
Escherichia phage P13374	V-197	0.00430589	0.000257007	Erwinia phage ENT90	V-112	0.0516642	0.000244323		0	-0.199156	-0.2		0.800844	8.52425e-26	1	0	1.58861e-24	0	0
Aeromonas virus Aeh1	V-41	0.000142658	1.89259e-05	Shigella phage Ss-VASD	V-174	0.0145236	0.00130677		0.0129043	-0.290879	-0.3		0.395934	1.85662e-05	0.686813	9.79634e-09	4.45155e-05	4.03668e-08	0.0352719
Aeromonas virus Aeh1	V-41	0.000142658	1.89259e-05	Enterobacteria phage phi80	V-335	0.0635547	0.0195707		0.00726499	-0.301761	-0.3		0.411985	7.75481e-06	0.713746	1.37722e-09	1.94463e-05	7.23922e-09	0.0209028
Shigella phage Shfl2	V-51	0.0012833	0.000120929	Salmonella phage STML-198	V-34	0.00194662	0.000164983		0	-0.299681	-0.3		0.700319	1.67179e-17	1	0	1.5578e-16	0	0
Shigella phage Shfl2	V-51	0.0012833	0.000120929	Rhodococcus phage RGL3	V-246	0.00511389	0.000258776		0	-0.306921	-0.3		0.693079	4.86709e-17	1	0	4.38573e-16	0	0
Shigella phage Shfl2	V-51	0.0012833	0.000120929	Enterobacteria phage 9g	V-252*	0.00762045	0.00014862		0	-0.298313	-0.3		0.701687	1.36123e-17	1	0	1.283e-16	0	0
Shigella phage Shfl2	V-51	0.0012833	0.000120929	Enterobacteria phage HK106	V-320	0.0154295	0.00247732		0	-0.31317	-0.3		0.68683	1.19413e-16	1	0	1.03072e-15	0	0
Salmonella phage STML-198	V-34	0.00194662	0.000164983	Erwinia phage ENT90	V-112	0.0516642	0.000244323		0	-0.276775	-0.3		0.723225	4.55729e-19	1	0	5.33854e-18	0	0
Escherichia phage phi191	V-172	0.00305492	0.000157793	Rhodococcus phage RGL3	V-246	0.00511389	0.000258776		0	-0.263968	-0.3		0.736032	5.17522e-20	1	0	6.63074e-19	0	0
Escherichia phage phi191	V-172	0.00305492	0.000157793	Erwinia phage ENT90	V-112	0.0516642	0.000244323		0	-0.312168	-0.3		0.687832	1.03564e-16	1	0	9.03431e-16	0	0
Escherichia phage P13374	V-197	0.00430589	0.000257007	Vibrio phage pYD38-A	V-536	0.00671181	0.0001519		0	-0.303071	-0.3		0.696929	2.76822e-17	1	0	2.52215e-16	0	0
Cronobacter phage phiES15	V-316	0.00540526	0.000110426	Shigella phage Ss-VASD	V-174	0.0145236	0.00130677		0.016025	-0.279739	-0.3		0.407074	1.01782e-05	0.686813	9.79634e-09	2.53681e-05	4.03668e-08	0.0429429
Cronobacter phage phiES15	V-316	0.00540526	0.000110426	Enterobacterial phage mEp213	V-337	0.0273669	0.00435668		0	-0.283757	-0.3		0.716243	1.41853e-18	1	0	1.53052e-17	0	0
Shigella phage Ss-VASD	V-174	0.0145236	0.00130677	Enterobacteria phage 9g	V-252*	0.00762045	0.00014862		0.011024	-0.298878	-0.3		0.387935	2.82138e-05	0.686813	9.79634e-09	6.68652e-05	4.03668e-08	0.0305394
Shigella phage Ss-VASD	V-174	0.0145236	0.00130677	Salmonella phage SE2	V-217	0.0258604	0.000176406		0.00745625	-0.318389	-0.3		0.368424	7.49011e-05	0.686813	9.79634e-09	0.000171561	4.03668e-08	0.021336
Enterobacteria phage 9g	V-252*	0.00762045	0.00014862	Enterobacteria phage HK106	V-320	0.0154295	0.00247732		0	-0.349939	-0.3		0.650061	1.53673e-14	1	0	1.09576e-13	0	0
Enterobacteria phage 9g	V-252*	0.00762045	0.00014862	Enterobacteria phage phi80	V-335	0.0635547	0.0195707		0.00630899	-0.308398	-0.3		0.405348	1.11872e-05	0.713746	1.37722e-09	2.7631e-05	7.23922e-09	0.0185425
Enterobacteria phage HK106	V-320	0.0154295	0.00247732		V-193				0	-0.290738	-0.3		0.709262	4.26955e-18	1	0	4.32226e-17	0	0
Anaerostipes_unclassified	B-197	0.0212401	0.00502588	Escherichia virus P2	V-16	0.631405	0.0780385		0.00694615	-0.321875	-0.3		0.364938	8.85997e-05	0.686813	9.79634e-09	0.000201811	4.03668e-08	0.0201078
Aeromonas virus Aeh1	V-41	0.000142658	1.89259e-05	Salmonella phage STML-198	V-34	0.00194662	0.000164983		0	-0.372733	-0.4		0.627267	2.2653e-13	1	0	1.36584e-12	0	0
Aeromonas virus Aeh1	V-41	0.000142658	1.89259e-05	Rhodococcus phage RGL3	V-246	0.00511389	0.000258776		0	-0.369662	-0.4		0.630338	1.5969e-13	1	0	9.92017e-13	0	0
Aeromonas virus Aeh1	V-41	0.000142658	1.89259e-05	Enterobacteria phage HK106	V-320	0.0154295	0.00247732		0	-0.370765	-0.4		0.629235	1.81152e-13	1	0	1.11687e-12	0	0
Aeromonas virus Aeh1	V-41	0.000142658	1.89259e-05	Salmonella phage SE2	V-217	0.0258604	0.000176406		0	-0.404548	-0.4		0.595452	6.83241e-12	1	0	3.37505e-11	0	0
Aeromonas virus Aeh1	V-41	0.000142658	1.89259e-05	Erwinia phage ENT90	V-112	0.0516642	0.000244323		0	-0.434692	-0.4		0.565308	1.24196e-10	1	0	5.27672e-10	0	0
Pseudomonas phage OBP	V-135	0.00117447	5.91875e-05	Shigella phage Shfl2	V-51	0.0012833	0.000120929		0	-0.38748	-0.4		0.61252	1.15206e-12	1	0	6.29793e-12	0	0
Pseudomonas phage OBP	V-135	0.00117447	5.91875e-05	Escherichia phage phi191	V-172	0.00305492	0.000157793		0	-0.366154	-0.4		0.633846	1.06602e-13	1	0	6.88299e-13	0	0
Pseudomonas phage OBP	V-135	0.00117447	5.91875e-05	Escherichia phage P13374	V-197	0.00430589	0.000257007		0	-0.384799	-0.4		0.615201	8.62573e-13	1	0	4.84459e-12	0	0
Pseudomonas phage OBP	V-135	0.00117447	5.91875e-05	Cronobacter phage phiES15	V-316	0.00540526	0.000110426		0	-0.427319	-0.4		0.572681	6.27748e-11	1	0	2.78245e-10	0	0
Pseudomonas phage OBP	V-135	0.00117447	5.91875e-05	Enterobacteria phage 9g	V-252*	0.00762045	0.00014862		0	-0.43136	-0.4		0.56864	9.14338e-11	1	0	3.92543e-10	0	0
Pseudomonas phage OBP	V-135	0.00117447	5.91875e-05	Enterobacteria phage HK106	V-320	0.0154295	0.00247732		0	-0.428812	-0.4		0.571188	7.21741e-11	1	0	3.18187e-10	0	0
Pseudomonas phage OBP	V-135	0.00117447	5.91875e-05	Enterobacterial phage mEp213	V-337	0.0273669	0.00435668		0	-0.40505	-0.4		0.59495	7.18794e-12	1	0	3.52941e-11	0	0
Pseudomonas phage OBP	V-135	0.00117447	5.91875e-05	Bacteroides phage B124-14	V-301	17.2391	4.45989		0.00331979	-0.446117	-0.4		-0.512579	1.03657e-08	-0.0664622	0.633009	3.48356e-08	0.898858	0.01043
Shigella phage Shfl2	V-51	0.0012833	0.000120929	Cronobacter phage phiES15	V-316	0.00540526	0.000110426		0	-0.407733	-0.4		0.592267	9.41527e-12	1	0	4.59555e-11	0	0
Shigella phage Shfl2	V-51	0.0012833	0.000120929	Erwinia phage ENT90	V-112	0.0516642	0.000244323		0	-0.367235	-0.4		0.632765	1.20809e-13	1	0	7.67934e-13	0	0
Salmonella phage STML-198	V-34	0.00194662	0.000164983	Escherichia phage phi191	V-172	0.00305492	0.000157793		0	-0.389548	-0.4		0.610452	1.43761e-12	1	0	7.75552e-12	0	0
Salmonella phage STML-198	V-34	0.00194662	0.000164983	Escherichia phage P13374	V-197	0.00430589	0.000257007		0	-0.384368	-0.4		0.615632	8.23195e-13	1	0	4.68764e-12	0	0
Salmonella phage STML-198	V-34	0.00194662	0.000164983	Enterobacteria phage HK106	V-320	0.0154295	0.00247732		0	-0.442818	-0.4		0.557182	2.58429e-10	1	0	1.04907e-09	0	0
Salmonella phage STML-198	V-34	0.00194662	0.000164983	Enterobacterial phage mEp213	V-337	0.0273669	0.00435668		0	-0.386198	-0.4		0.613802	1.00359e-12	1	0	5.56044e-12	0	0
Salmonella phage STML-198	V-34	0.00194662	0.000164983	Sphingomonas phage PAU	V-147	0.260049	0.062974		0.0125923	-0.418145	-0.4		-0.190526	0.0461817	0.227619	0.0978593	0.0796213	0.202127	0.034534
Salmonella phage STML-198	V-34	0.00194662	0.000164983	Bacteroides phage B124-14	V-301	17.2391	4.45989		0.0145893	-0.381507	-0.4		-0.447969	9.23595e-07	-0.0664622	0.633009	2.49128e-06	0.898858	0.0393528
Clostridium_scindens	B-224	0.00168468	0.000258704	Streptococcus phage SpSL1	V-458	0.481889	0.010631		0.000458737	-0.423727	-0.4		0.29002	0.00211676	0.713746	1.37722e-09	0.00430705	7.23922e-09	0.00169443
Escherichia phage phi191	V-172	0.00305492	0.000157793	Sphingomonas phage PAU	V-147	0.260049	0.062974		0.0188856	-0.393877	-0.4		-0.166258	0.0825788	0.227619	0.0978593	0.137912	0.202127	0.0496352
Rhodococcus phage RGL3	V-246	0.00511389	0.000258776	Cronobacter phage phiES15	V-316	0.00540526	0.000110426		0	-0.35306	-0.4		0.64694	2.25144e-14	1	0	1.55141e-13	0	0
Rhodococcus phage RGL3	V-246	0.00511389	0.000258776	Vibrio phage pYD38-A	V-536	0.00671181	0.0001519		0	-0.399934	-0.4		0.600066	4.26677e-12	1	0	2.17314e-11	0	0
Rhodococcus phage RGL3	V-246	0.00511389	0.000258776	Enterobacterial phage mEp213	V-337	0.0273669	0.00435668		0	-0.387959	-0.4		0.612041	1.21292e-12	1	0	6.58674e-12	0	0
Rhodococcus phage RGL3	V-246	0.00511389	0.000258776	Sphingomonas phage PAU	V-147	0.260049	0.062974		0.0125923	-0.418145	-0.4		-0.190526	0.0461817	0.227619	0.0978593	0.0796213	0.202127	0.034534
Rhodococcus phage RGL3	V-246	0.00511389	0.000258776	Bacteroides phage B124-14	V-301	17.2391	4.45989		0.0145893	-0.381507	-0.4		-0.447969	9.23595e-07	-0.0664622	0.633009	2.49128e-06	0.898858	0.0393528
Cronobacter phage phiES15	V-316	0.00540526	0.000110426	Erwinia phage ENT90	V-112	0.0516642	0.000244323		0	-0.437394	-0.4		0.562606	1.58801e-10	1	0	6.61001e-10	0	0
Vibrio phage pYD38-A	V-536	0.00671181	0.0001519	Erwinia phage ENT90	V-112	0.0516642	0.000244323		0	-0.446249	-0.4		0.553751	3.50065e-10	1	0	1.38673e-09	0	0
Enterobacteria phage Phi1	V-33	0.00368588	0.0665533	Wickerhamomyces ciferrii	F-2	15.2627	4.90711		0.00752694	-0.398594	-0.4		0.122609	0.201931	0.521203	5.32349e-05	0.294632	0.000189794	0.0214309
Shigella phage Ss-VASD	V-174	0.0145236	0.00130677	Enterobacteria phage mEp235	V-330	0.0183153	0.0024515		0	-0.393496	-0.4		0.606504	2.18393e-12	1	0	1.13963e-11	0	0
Shigella phage Ss-VASD	V-174	0.0145236	0.00130677	Anaerostipes_unclassified	B-197	0.0212401	0.00502588		0.00124399	-0.381449	-0.4		0.332298	0.000390098	0.713746	1.37722e-09	0.000857588	7.23922e-09	0.00423265
Shigella phage Ss-VASD	V-174	0.0145236	0.00130677	Enterobacteria phage IME10	V-193	0.108759	0.00202435		0.00183955	-0.384686	-0.4		0.302127	0.00133732	0.686813	9.79634e-09	0.00278325	4.03668e-08	0.00603372
Enterobacteria phage 9g	V-252*	0.00762045	0.00014862	Salmonella phage SE2	V-217	0.0258604	0.000176406		0	-0.401691	-0.4		0.598309	5.10879e-12	1	0	2.57006e-11	0	0
Enterobacteria phage 9g	V-252*	0.00762045	0.00014862	Enterobacteria phage IME10	V-193	0.108759	0.00202435		0	-0.422572	-0.4		0.577428	4.00933e-11	1	0	1.83668e-10	0	0
Enterobacteria phage mEp235	V-330	0.0183153	0.0024515	Anaerostipes_unclassified	B-197	0.0212401	0.00502588		0.00205919	-0.35938	-0.4		0.354366	0.000145755	0.713746	1.37722e-09	0.000331079	7.23922e-09	0.00667405
Enterobacteria phage mEp235	V-330	0.0183153	0.0024515	Lactococcus phage 50101	V-382	0.851011	0.0168807		0.00676064	-0.449818	-0.4		-0.144941	0.130844	0.304877	0.024986	0.204472	0.0604382	0.0196586
Enterobacteria phage HK106	V-320	0.0154295	0.00247732	Enterobacterial phage mEp213	V-337	0.0273669	0.00435668		0	-0.40183	-0.4		0.59817	5.18222e-12	1	0	2.59111e-11	0	0
Enterobacteria phage HK106	V-320	0.0154295	0.00247732	Salmonella phage SE2	V-217	0.0258604	0.000176406		0	-0.403237	-0.4		0.596763	5.98129e-12	1	0	2.97252e-11	0	0
Enterobacterial phage mEp213	V-337	0.0273669	0.00435668	Erwinia phage ENT90	V-112	0.0516642	0.000244323		0	-0.385203	-0.4		0.614797	9.01256e-13	1	0	5.02741e-12	0	0
Enterobacterial phage mEp213	V-337	0.0273669	0.00435668	Enterobacteria phage IME10	V-193	0.108759	0.00202435		0	-0.360849	-0.4		0.639151	5.72868e-14	1	0	3.78832e-13	0	0
Shigella phage 75/02 Stx	V-169	0.0397033	0.0112888	Streptococcus phage SpSL1	V-458	0.481889	0.010631		0.0074676	-0.441687	-0.4		-0.109619	0.254286	0.332068	0.0141612	0.357046	0.0368641	0.021336
Erwinia phage ENT90	V-112	0.0516642	0.000244323	Sphingomonas phage PAU	V-147	0.260049	0.062974		0.0162024	-0.403217	-0.4		-0.175598	0.0665153	0.227619	0.0978593	0.112227	0.202127	0.0432769
Erwinia phage ENT90	V-112	0.0516642	0.000244323	Bacteroides phage B124-14	V-301	17.2391	4.45989		0.00557793	-0.42514	-0.4		-0.491603	4.93437e-08	-0.0664622	0.633009	1.52525e-07	0.898858	0.0166324
Lachnospiraceae_bacterium_6_1_63FAA	B-259	0.0582086	3.61161e-05	Enterobacteria phage WPhi	V-12	0.320165	0.00278622		0	-0.413136	-0.4		0.586864	1.60927e-11	1	0	7.62775e-11	0	0
Lachnospiraceae_bacterium_6_1_63FAA	B-259	0.0582086	3.61161e-05	Yersinia phage L-413C	V-21	0.394923	0.0165691		0	-0.430584	-0.4		0.569416	8.50937e-11	1	0	3.6919e-10	0	0
Enterobacteria phage WPhi	V-12	0.320165	0.00278622	Pseudomonas phage phiKZ	V-67	1.37487	0.404007		0.005143	-0.426452	-0.4		-0.501414	2.4096e-08	-0.0749622	0.590075	7.84075e-08	0.882433	0.0155046
Escherichia phage pro147	V-13	0.494377	0.105611	Pseudomonas phage phiKZ	V-67	1.37487	0.404007		0.00507001	-0.418689	-0.4		-0.526006	3.60777e-09	-0.107316	0.439883	1.28625e-08	0.731651	0.015341
Aeromonas virus Aeh1	V-41	0.000142658	1.89259e-05	Pseudomonas phage OBP	V-135	0.00117447	5.91875e-05		0	-0.454571	-0.5		0.545429	7.207e-10	1	0	2.76156e-09	0	0
Aeromonas virus Aeh1	V-41	0.000142658	1.89259e-05	Cronobacter phage phiES15	V-316	0.00540526	0.000110426		0	-0.511041	-0.5		0.488959	5.96289e-08	1	0	1.82447e-07	0	0
Pseudomonas phage OBP	V-135	0.00117447	5.91875e-05	Vibrio phage pYD38-A	V-536	0.00671181	0.0001519		0	-0.477799	-0.5		0.522201	4.88811e-09	1	0	1.70564e-08	0	0
Pseudomonas phage OBP	V-135	0.00117447	5.91875e-05	Lactococcus phage 50101	V-382	0.851011	0.0168807		0.000558631	-0.54544	-0.5		-0.0699496	0.467749	0.47549	0.000279525	0.566549	0.000824499	0.00201796
Pseudoflavonifractor_capillosus	B-275	0.00113864	0.0079208	Alistipes_putredinis	B-47	1.82585	4.91898		0.00158562	-0.519067	-0.5		-0.157977	0.0992872	0.36109	0.00730669	0.161539	0.0191421	0.00530697
Shigella phage Shfl2	V-51	0.0012833	0.000120929	Enterobacterial phage mEp213	V-337	0.0273669	0.00435668		0	-0.495002	-0.5		0.504998	1.84403e-08	1	0	6.12189e-08	0	0
Shigella phage Shfl2	V-51	0.0012833	0.000120929	Salmonella phage SE2	V-217	0.0258604	0.000176406		0	-0.473427	-0.5		0.526573	3.44674e-09	1	0	1.24508e-08	0	0
Salmonella phage STML-198	V-34	0.00194662	0.000164983	Cronobacter phage phiES15	V-316	0.00540526	0.000110426		0	-0.470459	-0.5		0.529541	2.71129e-09	1	0	1.01057e-08	0	0
Salmonella phage STML-198	V-34	0.00194662	0.000164983	Vibrio phage pYD38-A	V-536	0.00671181	0.0001519		0	-0.515811	-0.5		0.484189	8.3568e-08	1	0	2.50094e-07	0	0
Salmonella phage STML-198	V-34	0.00194662	0.000164983	Enterobacteria phage 9g	V-252*	0.00762045	0.00014862		0	-0.515495	-0.5		0.484505	8.17362e-08	1	0	2.45508e-07	0	0
Salmonella phage STML-198	V-34	0.00194662	0.000164983	Lactococcus phage 50101	V-382	0.851011	0.0168807		0.000786053	-0.529628	-0.5		-0.0541382	0.574299	0.47549	0.000279525	0.665148	0.000824499	0.00281469
Clostridium_scindens	B-224	0.00168468	0.000258704	Enterobacteria phage Phi1	V-33	0.00368588	0.0665533		0.0041567	-0.457916	-0.5		-0.0285579	0.76711	0.429358	0.00119616	0.814806	0.00324785	0.0129784
Rhodococcus phage RGL3	V-246	0.00511389	0.000258776	Enterobacteria phage 9g	V-252*	0.00762045	0.00014862		0	-0.52087	-0.5		0.47913	1.1888e-07	1	0	3.4815e-07	0	0
Cronobacter phage phiES15	V-316	0.00540526	0.000110426	Enterobacteria phage 9g	V-252*	0.00762045	0.00014862		0	-0.504724	-0.5		0.495276	3.78289e-08	1	0	1.20232e-07	0	0
Cronobacter phage phiES15	V-316	0.00540526	0.000110426	Enterobacteria phage HK106	V-320	0.0154295	0.00247732		0	-0.471154	-0.5		0.528846	2.86883e-09	1	0	1.06445e-08	0	0
Cronobacter phage phiES15	V-316	0.00540526	0.000110426	Salmonella phage SE2	V-217	0.0258604	0.000176406		0	-0.484333	-0.5		0.515667	8.16467e-09	1	0	2.7896e-08	0	0
Shigella phage Ss-VASD	V-174	0.0145236	0.00130677	Lactococcus phage 50101	V-382	0.851011	0.0168807		0.00608322	-0.455619	-0.5		-0.150742	0.115967	0.304877	0.024986	0.186092	0.0604382	0.0179433
Escherichia phage TL-2011c	V-173	0.0155185	0.00562618	Bacillus phage AR9	V-73	0.038529	1.75833e-05		0.00112539	-0.517878	-0.5		-0.0617961	0.521307	0.456082	0.000528298	0.611547	0.00146849	0.00384508
Enterobacteria phage mEp235	V-330	0.0183153	0.0024515	Streptococcus phage SpSL1	V-458	0.481889	0.010631		0.000496895	-0.549342	-0.5		-0.0689216	0.474331	0.48042	0.000236342	0.572315	0.000791023	0.00181899
Enterobacteria phage HK106	V-320	0.0154295	0.00247732	Erwinia phage ENT90	V-112	0.0516642	0.000244323		0	-0.510142	-0.5		0.489858	5.59197e-08	1	0	1.71738e-07	0	0
Anaerostipes_unclassified	B-197	0.0212401	0.00502588	Lachnospiraceae_bacterium_6_1_63FAA	B-259	0.0582086	3.61161e-05		0	-0.478985	-0.5		0.521015	5.36971e-09	1	0	1.86575e-08	0	0
Enterobacterial phage mEp213	V-337	0.0273669	0.00435668	Salmonella phage SE2	V-217	0.0258604	0.000176406		0	-0.481922	-0.5		0.518078	6.7654e-09	1	0	2.33094e-08	0	0
Shigella phage 75/02 Stx	V-169	0.0397033	0.0112888	Bacillus phage AR9	V-73	0.038529	1.75833e-05		0.000811638	-0.528124	-0.5		-0.0526341	0.584995	0.47549	0.000279525	0.675824	0.000824499	0.00288408
Salmonella phage SE2	V-217	0.0258604	0.000176406	Enterobacteria phage IME10	V-193	0.108759	0.00202435		0	-0.47226	-0.5		0.52774	3.13732e-09	1	0	1.15363e-08	0	0
Enterobacteria phage phi80	V-335	0.0635547	0.0195707	Lactococcus phage 50101	V-382	0.851011	0.0168807		0.00302036	-0.4914	-0.5		-0.172928	0.070825	0.318473	0.0189253	0.119254	0.0488012	0.00952576
Yersinia phage L-413C	V-21	0.394923	0.0165691	Pseudomonas phage phiKZ	V-67	1.37487	0.404007		0.00272141	-0.451445	-0.5		-0.526408	3.49304e-09	-0.0749622	0.590075	1.25627e-08	0.882433	0.00864945
Escherichia phage pro147	V-13	0.494377	0.105611	Streptococcus phage SpSL1	V-458	0.481889	0.010631		0.00128481	-0.52773	-0.5		-0.155383	0.105036	0.372347	0.00556067	0.169546	0.0147089	0.00435349
Escherichia phage pro147	V-13	0.494377	0.105611	Bacteroides phage B124-14	V-301	17.2391	4.45989		0.00170749	-0.483319	-0.5		-0.503399	2.07857e-08	-0.0200801	0.885406	6.79054e-08	0.898858	0.00564573
Pseudomonas phage phiKZ	V-67	1.37487	0.404007	Escherichia virus P2	V-16	0.631405	0.0780385		0.00245231	-0.468646	-0.5		-0.492309	4.68981e-08	-0.023663	0.865135	1.46222e-07	0.898858	0.00782448
Pseudomonas phage phiKZ	V-67	1.37487	0.404007	Wickerhamomyces ciferrii	F-2	15.2627	4.90711		0.000812466	-0.500664	-0.5		-0.551778	4.16174e-10	-0.0511147	0.71357	1.62506e-09	0.898858	0.00288408
Streptococcus phage SpSL1	V-458	0.481889	0.010631	Wickerhamomyces ciferrii	F-2	15.2627	4.90711		0.00139996	-0.520455	-0.5		-0.126849	0.186651	0.393605	0.00323386	0.274715	0.00860962	0.00470478
Escherichia virus P2	V-16	0.631405	0.0780385	Bacteroides phage B124-14	V-301	17.2391	4.45989		0.000856314	-0.51874	-0.5		-0.497715	3.16558e-08	0.0210246	0.880054	1.02196e-07	0.898858	0.00300076
Aeromonas virus Aeh1	V-41	0.000142658	1.89259e-05	Enterobacterial phage mEp213	V-337	0.0273669	0.00435668		0	-0.567347	-0.6		0.432653	2.35391e-06	1	0	6.12764e-06	0	0
Aeromonas virus Aeh1	V-41	0.000142658	1.89259e-05	Enterobacteria phage IME10	V-193	0.108759	0.00202435		0	-0.552642	-0.6		0.447358	9.59551e-07	1	0	2.57978e-06	0	0
Aeromonas virus Aeh1	V-41	0.000142658	1.89259e-05	Lactococcus phage 50101	V-382	0.851011	0.0168807		0.000418107	-0.558539	-0.6		-0.0830493	0.388374	0.47549	0.000279525	0.487698	0.000824499	0.00156551
Pseudomonas phage OBP	V-135	0.00117447	5.91875e-05	Salmonella phage SE2	V-217	0.0258604	0.000176406		0	-0.621773	-0.6		0.378227	4.62176e-05	1	0	0.000107666	0	0
Shigella phage Shfl2	V-51	0.0012833	0.000120929	Escherichia phage P13374	V-197	0.00430589	0.000257007		0	-0.59633	-0.6		0.40367	1.22583e-05	1	0	3.00953e-05	0	0
Shigella phage Shfl2	V-51	0.0012833	0.000120929	Enterobacteria phage IME10	V-193	0.108759	0.00202435		0	-0.610958	-0.6		0.389042	2.66435e-05	1	0	6.35106e-05	0	0
Shigella phage Shfl2	V-51	0.0012833	0.000120929	Lactococcus phage 50101	V-382	0.851011	0.0168807		0.000346472	-0.566887	-0.6		-0.0913973	0.342304	0.47549	0.000279525	0.448673	0.000824499	0.00132143
Clostridium_scindens	B-224	0.00168468	0.000258704	Escherichia phage TL-2011c	V-173	0.0155185	0.00562618		4.29309e-05	-0.641186	-0.6		-0.12688	0.186542	0.514306	6.9426e-05	0.274715	0.000242252	0.000192368
Escherichia phage phi191	V-172	0.00305492	0.000157793	Cronobacter phage phiES15	V-316	0.00540526	0.000110426		0	-0.584606	-0.6		0.415394	6.40506e-06	1	0	1.62103e-05	0	0
Escherichia phage phi191	V-172	0.00305492	0.000157793	Enterobacterial phage mEp213	V-337	0.0273669	0.00435668		0	-0.57753	-0.6		0.42247	4.27735e-06	1	0	1.09607e-05	0	0
Escherichia phage phi191	V-172	0.00305492	0.000157793	Lactococcus phage 50101	V-382	0.851011	0.0168807		0.000346472	-0.566887	-0.6		-0.0913973	0.342304	0.47549	0.000279525	0.448673	0.000824499	0.00132143
Rhodococcus phage RGL3	V-246	0.00511389	0.000258776	Enterobacteria phage HK106	V-320	0.0154295	0.00247732		0	-0.550578	-0.6		0.449422	8.43125e-07	1	0	2.29689e-06	0	0
Rhodococcus phage RGL3	V-246	0.00511389	0.000258776	Lactococcus phage 50101	V-382	0.851011	0.0168807		0.000152085	-0.602161	-0.6		-0.126671	0.187275	0.47549	0.000279525	0.274715	0.000824499	0.000602464
Escherichia phage P13374	V-197	0.00430589	0.000257007	Enterobacterial phage mEp213	V-337	0.0273669	0.00435668		0	-0.564473	-0.6		0.435527	1.98181e-06	1	0	5.20861e-06	0	0
Escherichia phage P13374	V-197	0.00430589	0.000257007	Lactococcus phage 50101	V-382	0.851011	0.0168807		0.000244856	-0.582011	-0.6		-0.106521	0.268038	0.47549	0.000279525	0.370642	0.000824499	0.000956106
Cronobacter phage phiES15	V-316	0.00540526	0.000110426	Vibrio phage pYD38-A	V-536	0.00671181	0.0001519		0	-0.581682	-0.6		0.418318	5.42688e-06	1	0	1.3863e-05	0	0
Cronobacter phage phiES15	V-316	0.00540526	0.000110426	Enterobacteria phage IME10	V-193	0.108759	0.00202435		0	-0.61167	-0.6		0.38833	2.76435e-05	1	0	6.57033e-05	0	0
Cronobacter phage phiES15	V-316	0.00540526	0.000110426	Lactococcus phage 50101	V-382	0.851011	0.0168807		0.000290113	-0.574669	-0.6		-0.099179	0.302607	0.47549	0.000279525	0.408121	0.000824499	0.00112214
Vibrio phage pYD38-A	V-536	0.00671181	0.0001519	Enterobacterial phage mEp213	V-337	0.0273669	0.00435668		0	-0.572626	-0.6		0.427374	3.21599e-06	1	0	8.29279e-06	0	0
Vibrio phage pYD38-A	V-536	0.00671181	0.0001519	Lactococcus phage 50101	V-382	0.851011	0.0168807		0.000346472	-0.566887	-0.6		-0.0913973	0.342304	0.47549	0.000279525	0.448673	0.000824499	0.00132143
Enterobacteria phage Phi1	V-33	0.00368588	0.0665533	Escherichia phage pro483	V-14	0.526578	0.158456		3.5398e-05	-0.623311	-0.6		-0.0474979	0.622189	0.575813	5.22662e-06	0.710578	2.09065e-05	0.000160367
Shigella phage Ss-VASD	V-174	0.0145236	0.00130677	Streptococcus phage SpSL1	V-458	0.481889	0.010631		8.41119e-05	-0.624993	-0.6		-0.144573	0.131836	0.48042	0.000236342	0.205524	0.000791023	0.000355866
Enterobacteria phage 9g	V-252*	0.00762045	0.00014862	Enterobacterial phage mEp213	V-337	0.0273669	0.00435668		0	-0.564896	-0.6		0.435104	2.03281e-06	1	0	5.32557e-06	0	0
Enterobacteria phage 9g	V-252*	0.00762045	0.00014862	Erwinia phage ENT90	V-112	0.0516642	0.000244323		0	-0.582319	-0.6		0.417681	5.62698e-06	1	0	1.42852e-05	0	0
Enterobacteria phage 9g	V-252*	0.00762045	0.00014862	Lactococcus phage 50101	V-382	0.851011	0.0168807		0.000418107	-0.558539	-0.6		-0.0830493	0.388374	0.47549	0.000279525	0.487698	0.000824499	0.00156551
Enterobacteria phage HK106	V-320	0.0154295	0.00247732	Lactococcus phage 50101	V-382	0.851011	0.0168807		0.000152085	-0.602161	-0.6		-0.126671	0.187275	0.47549	0.000279525	0.274715	0.000824499	0.000602464
Enterobacterial phage mEp213	V-337	0.0273669	0.00435668	Lactococcus phage 50101	V-382	0.851011	0.0168807		0.000112714	-0.6145	-0.6		-0.13901	0.147524	0.47549	0.000279525	0.226112	0.000824499	0.000462128
Salmonella phage SE2	V-217	0.0258604	0.000176406	Erwinia phage ENT90	V-112	0.0516642	0.000244323		0	-0.615054	-0.6		0.384946	3.28988e-05	1	0	7.75201e-05	0	0
Salmonella phage SE2	V-217	0.0258604	0.000176406	Lactococcus phage 50101	V-382	0.851011	0.0168807		0.000244856	-0.582011	-0.6		-0.106521	0.268038	0.47549	0.000279525	0.370642	0.000824499	0.000956106
Bacillus phage AR9	V-73	0.038529	1.75833e-05	Escherichia phage pro147	V-13	0.494377	0.105611		7.38276e-05	-0.608578	-0.6		-0.0646991	0.501888	0.543879	2.13269e-05	0.593009	7.67022e-05	0.000315305
Erwinia phage ENT90	V-112	0.0516642	0.000244323	Lactococcus phage 50101	V-382	0.851011	0.0168807		0.000112714	-0.6145	-0.6		-0.13901	0.147524	0.47549	0.000279525	0.226112	0.000824499	0.000462128
Enterobacteria phage IME10	V-193	0.108759	0.00202435	Lactococcus phage 50101	V-382	0.851011	0.0168807		0.000112714	-0.6145	-0.6		-0.13901	0.147524	0.47549	0.000279525	0.226112	0.000824499	0.000462128
Escherichia phage pro483	V-14	0.526578	0.158456	Pseudomonas phage phiKZ	V-67	1.37487	0.404007		0.000120339	-0.582202	-0.6		-0.558441	2.31001e-10	0.0237616	0.864578	9.47105e-10	0.898858	0.000490935
Escherichia phage pro483	V-14	0.526578	0.158456	Streptococcus phage SpSL1	V-458	0.481889	0.010631		0.000540915	-0.558553	-0.6		-0.130867	0.172966	0.427686	0.00125619	0.259766	0.00339958	0.00196261
Streptococcus phage SpSL1	V-458	0.481889	0.010631	Escherichia virus P2	V-16	0.631405	0.0780385		0.000101644	-0.622207	-0.6		-0.160655	0.0936165	0.461552	0.000443212	0.154148	0.00130263	0.000427427
Aeromonas virus Aeh1	V-41	0.000142658	1.89259e-05	Escherichia phage P13374	V-197	0.00430589	0.000257007		0	-0.728061	-0.7		0.271939	0.00405434	1	0	0.00804979	0	0
Pseudomonas phage OBP	V-135	0.00117447	5.91875e-05	Enterobacteria phage IME10	V-193	0.108759	0.00202435		0	-0.663127	-0.7		0.336873	0.000319975	1	0	0.000709133	0	0
Pseudoflavonifractor_capillosus	B-275	0.00113864	0.0079208	Bacteroides_gallinarum	B-67	0.000862545	0.0924803		1.42659e-06	-0.687225	-0.7		-0.0267994	0.781078	0.660425	5.52323e-08	0.823245	2.2421e-07	7.22103e-06
Shigella phage Shfl2	V-51	0.0012833	0.000120929	Escherichia phage phi191	V-172	0.00305492	0.000157793		0	-0.686014	-0.7		0.313986	0.000836597	1	0	0.00176806	0	0
Salmonella phage STML-198	V-34	0.00194662	0.000164983	Salmonella phage SE2	V-217	0.0258604	0.000176406		0	-0.654533	-0.7		0.345467	0.000218695	1	0	0.000492666	0	0
Salmonella phage STML-198	V-34	0.00194662	0.000164983	Enterobacteria phage IME10	V-193	0.108759	0.00202435		0	-0.684565	-0.7		0.315435	0.000788952	1	0	0.00167601	0	0
Rhodococcus phage RGL3	V-246	0.00511389	0.000258776	Salmonella phage SE2	V-217	0.0258604	0.000176406		0	-0.658611	-0.7		0.341389	0.000262332	1	0	0.000586137	0	0
Escherichia phage P13374	V-197	0.00430589	0.000257007	Cronobacter phage phiES15	V-316	0.00540526	0.000110426		0	-0.657776	-0.7		0.342224	0.000252794	1	0	0.000566369	0	0
Shigella phage Ss-VASD	V-174	0.0145236	0.00130677	Bacillus phage AR9	V-73	0.038529	1.75833e-05		1.7515e-07	-0.733776	-0.7		-0.0469629	0.626121	0.686813	9.79634e-09	0.714074	4.03668e-08	9.09004e-07
Enterobacteria phage mEp235	V-330	0.0183153	0.0024515	Bacillus phage AR9	V-73	0.038529	1.75833e-05		2.03992e-07	-0.728972	-0.7		-0.0421598	0.66188	0.686813	9.79634e-09	0.747656	4.03668e-08	1.03896e-06
Anaerostipes_unclassified	B-197	0.0212401	0.00502588	Enterobacteria phage WPhi	V-12	0.320165	0.00278622		0	-0.674269	-0.7		0.325731	0.000515691	1	0	0.00112166	0	0
Anaerostipes_unclassified	B-197	0.0212401	0.00502588	Yersinia phage L-413C	V-21	0.394923	0.0165691		0	-0.685108	-0.7		0.314892	0.000806499	1	0	0.00170886	0	0
Anaerostipes_unclassified	B-197	0.0212401	0.00502588	Streptococcus phage SpSL1	V-458	0.481889	0.010631		1.07674e-07	-0.74893	-0.7		-0.0621169	0.519142	0.686813	9.79634e-09	0.60988	4.03668e-08	5.65978e-07
Bacillus phage AR9	V-73	0.038529	1.75833e-05	Enterobacteria phage phi80	V-335	0.0635547	0.0195707		1.94447e-07	-0.704565	-0.7		0.0091818	0.924155	0.713746	1.37722e-09	0.932174	7.23922e-09	9.9654e-07
Erwinia phage ENT90	V-112	0.0516642	0.000244323	Enterobacteria phage IME10	V-193	0.108759	0.00202435		0	-0.744589	-0.7		0.255411	0.0070814	1	0	0.0137176	0	0
Lachnospiraceae_bacterium_6_1_63FAA	B-259	0.0582086	3.61161e-05	Streptococcus phage SpSL1	V-458	0.481889	0.010631		2.0942e-06	-0.652177	-0.7		0.0346357	0.71943	0.686813	9.79634e-09	0.779304	4.03668e-08	1.04075e-05
Escherichia phage phi191	V-172	0.00305492	0.000157793	Enterobacteria phage HK106	V-320	0.0154295	0.00247732		0	-0.830983	-0.8		0.169017	0.07754	1	0	0.130293	0	0
Rhodococcus phage RGL3	V-246	0.00511389	0.000258776	Enterobacteria phage IME10	V-193	0.108759	0.00202435		0	-0.772796	-0.8		0.227204	0.0169855	1	0	0.0312991	0	0
Escherichia phage P13374	V-197	0.00430589	0.000257007	Enterobacteria phage HK106	V-320	0.0154295	0.00247732		0	-0.758725	-0.8		0.241275	0.0111095	1	0	0.0207986	0	0
Enterobacteria phage WPhi	V-12	0.320165	0.00278622	Streptococcus phage SpSL1	V-458	0.481889	0.010631		5.34232e-09	-0.836839	-0.8		-0.150026	0.117728	0.686813	9.79634e-09	0.188181	4.03668e-08	3.02118e-08
Yersinia phage L-413C	V-21	0.394923	0.0165691	Streptococcus phage SpSL1	V-458	0.481889	0.010631		4.40085e-09	-0.842196	-0.8		-0.155383	0.105036	0.686813	9.79634e-09	0.169546	4.03668e-08	2.50604e-08
Aeromonas virus Aeh1	V-41	0.000142658	1.89259e-05	Escherichia phage phi191	V-172	0.00305492	0.000157793		0	-0.851525	-0.9		0.148475	0.121616	1	0	0.194018	0	0
Shigella phage Shfl2	V-51	0.0012833	0.000120929	Vibrio phage pYD38-A	V-536	0.00671181	0.0001519		0	-0.878548	-0.9		0.121452	0.206252	1	0	0.29934	0	0
Escherichia phage P13374	V-197	0.00430589	0.000257007	Enterobacteria phage 9g	V-252*	0.00762045	0.00014862		0	-0.909585	-0.9		0.090415	0.347539	1	0	0.453793	0	0
Escherichia phage TL-2011c	V-173	0.0155185	0.00562618	Streptococcus phage SpSL1	V-458	0.481889	0.010631		3.80675e-10	-0.875955	-0.9		-0.155383	0.105036	0.720572	8.08222e-10	0.169546	5.0591e-09	2.21385e-09
Salmonella phage SE2	V-217	0.0258604	0.000176406	Bacillus phage AR9	V-73	0.038529	1.75833e-05		0	-0.864991	-0.9		0.135009	0.159647	1	0	0.242477	0	0
Pseudomonas phage OBP	V-135	0.00117447	5.91875e-05	Bacillus phage AR9	V-73	0.038529	1.75833e-05		0	-1.04374	-1		-0.0437366	0.650051	1	0	0.738194	0	0
Escherichia phage P13374	V-197	0.00430589	0.000257007	Salmonella phage SE2	V-217	0.0258604	0.000176406		0	-0.958022	-1		0.041978	0.663249	1	0	0.747656	0	0
Escherichia phage P13374	V-197	0.00430589	0.000257007	Enterobacteria phage IME10	V-193	0.108759	0.00202435		0	-1.00834	-1		-0.00834082	0.931084	1	0	0.937505	0	0
Vibrio phage pYD38-A	V-536	0.00671181	0.0001519	Enterobacteria phage HK106	V-320	0.0154295	0.00247732		0	-0.959798	-1		0.0402024	0.67668	1	0	0.755964	0	0
Enterobacteria phage HK106	V-320	0.0154295	0.00247732	Bacillus phage AR9	V-73	0.038529	1.75833e-05		0	-1.00684	-1		-0.00684184	0.943446	1	0	0.946911	0	0
Enterobacterial phage mEp213	V-337	0.0273669	0.00435668	Bacillus phage AR9	V-73	0.038529	1.75833e-05		0	-1.03386	-1		-0.0338619	0.725445	1	0	0.783748	0	0
Bacillus phage AR9	V-73	0.038529	1.75833e-05	Erwinia phage ENT90	V-112	0.0516642	0.000244323		0	-1.0306	-1		-0.0306047	0.750945	1	0	0.801791	0	0
Bacillus phage AR9	V-73	0.038529	1.75833e-05	Enterobacteria phage IME10	V-193	0.108759	0.00202435		0	-1.03386	-1		-0.0338619	0.725445	1	0	0.783748	0	0
Aeromonas virus Aeh1	V-41	0.000142658	1.89259e-05	Vibrio phage pYD38-A	V-536	0.00671181	0.0001519		0	-1.05237	-1.1		-0.0523694	0.586886	1	0	0.675824	0	0
Aeromonas virus Aeh1	V-41	0.000142658	1.89259e-05	Bacillus phage AR9	V-73	0.038529	1.75833e-05		0	-1.06888	-1.1		-0.0688794	0.474602	1	0	0.572315	0	0
Shigella phage Shfl2	V-51	0.0012833	0.000120929	Bacillus phage AR9	V-73	0.038529	1.75833e-05		0	-1.0758	-1.1		-0.0758031	0.431234	1	0	0.529359	0	0
Salmonella phage STML-198	V-34	0.00194662	0.000164983	Bacillus phage AR9	V-73	0.038529	1.75833e-05		0	-1.10506	-1.1		-0.105059	0.274699	1	0	0.377309	0	0
Escherichia phage phi191	V-172	0.00305492	0.000157793	Enterobacteria phage 9g	V-252*	0.00762045	0.00014862		0	-1.05237	-1.1		-0.0523694	0.586886	1	0	0.675824	0	0
Escherichia phage phi191	V-172	0.00305492	0.000157793	Salmonella phage SE2	V-217	0.0258604	0.000176406		0	-1.06717	-1.1		-0.0671702	0.485661	1	0	0.57884	0	0
Escherichia phage phi191	V-172	0.00305492	0.000157793	Bacillus phage AR9	V-73	0.038529	1.75833e-05		0	-1.0758	-1.1		-0.0758031	0.431234	1	0	0.529359	0	0
Escherichia phage phi191	V-172	0.00305492	0.000157793	Enterobacteria phage IME10	V-193	0.108759	0.00202435		0	-1.08766	-1.1		-0.087657	0.362503	1	0	0.466644	0	0
Rhodococcus phage RGL3	V-246	0.00511389	0.000258776	Bacillus phage AR9	V-73	0.038529	1.75833e-05		0	-1.10506	-1.1		-0.105059	0.274699	1	0	0.377309	0	0
Escherichia phage P13374	V-197	0.00430589	0.000257007	Bacillus phage AR9	V-73	0.038529	1.75833e-05		0	-1.08835	-1.1		-0.0883463	0.358726	1	0	0.465436	0	0
Cronobacter phage phiES15	V-316	0.00540526	0.000110426	Bacillus phage AR9	V-73	0.038529	1.75833e-05		0	-1.08226	-1.1		-0.0822571	0.392931	1	0	0.492666	0	0
Vibrio phage pYD38-A	V-536	0.00671181	0.0001519	Enterobacteria phage 9g	V-252*	0.00762045	0.00014862		0	-1.05237	-1.1		-0.0523694	0.586886	1	0	0.675824	0	0
Vibrio phage pYD38-A	V-536	0.00671181	0.0001519	Salmonella phage SE2	V-217	0.0258604	0.000176406		0	-1.06717	-1.1		-0.0671702	0.485661	1	0	0.57884	0	0
Vibrio phage pYD38-A	V-536	0.00671181	0.0001519	Bacillus phage AR9	V-73	0.038529	1.75833e-05		0	-1.0758	-1.1		-0.0758031	0.431234	1	0	0.529359	0	0
Vibrio phage pYD38-A	V-536	0.00671181	0.0001519	Enterobacteria phage IME10	V-193	0.108759	0.00202435		0	-1.08766	-1.1		-0.087657	0.362503	1	0	0.466644	0	0
Enterobacteria phage 9g	V-252*	0.00762045	0.00014862	Bacillus phage AR9	V-73	0.038529	1.75833e-05		0	-1.06888	-1.1		-0.0688794	0.474602	1	0	0.572315	0	0
Groups: UCF - UCM
SOURCE		abundance		TARGET		abundance			p (difference)	(r1-r2)	EVIDENCE		r1	p1	r2	p2	lfdr (in cond. 1)	lfdr (in cond. 2)	lfdr (difference)
Megamonas_rupellensis	B-321	0.00477938	0.0889378	Malassezia globosa CBS 7966	F-9	12.4258	28.5005		0.000210458	0.642121	0.6		0.472059	1.66984e-05	-0.170063	0.228075	0.000638713	0.890348	0.0318239
Akkermansia_muciniphila	B-392	0.42213	0.0932721	Bacteroides_stercoris	B-81	4.92158	11.1751		0.000415999	0.561044	0.6		0.595854	1.36005e-08	0.0348098	0.806465	2.08088e-06	0.890348	0.0318239
Abbreviations: B,Bacteria; F,fungus; V,virus; CDM, CD in males; CDF, CD in femals; UCM, UC in males; UCF, UC in females; NONM, non-IBD in males; NONF, non-IBD in females.

## Sheet: Table S22_comments
Table S22: comments for the previous tables (S1, S2, & S3).
According to table S1:
Groups(I & II) : UCF - NONF
Microbes with differential Correlation between Groups I,II :								V-279	V-252
Microbes that their abundance in Group I is lower than Group II (p-value<0.05):								V-252
Groups(I & II) : CDF - NONF
Microbes with differential Correlation between Groups I,II :								B-296	B-89	V-193	V-247	V-252	V-324	V-330	V-334	V-439
Microbes that their abundance in Group I is lower than Group II (p-value<0.05):								B-296	V-193	V-252	V-324	V-330	V-334	V-439
Groups(I & II) : CDF - UCF
Microbes with differential Correlation between Groups I,II :								B-246	B-313	B-67	V-195	V-320	V-328	V-331	V-389	V-458	V-541	V-543
Microbes that their abundance in Group I is lower than Group II (p-value<0.05):								B-246	V-320	V-328	V-458
According to table S2:
Groups(I & II) : CDM - UCM
Microbes with differential Correlation between Groups I,II :								V-10	V-12	V-13	V-17	V-135	V-148	V-169	V-173	V-200	V-221	V-222	V-363	V-460	V-541	B-62	B-197	B-199	B-265	B-322	B-333	B-346	B-378	F-9	F-2
Microbes that their abundance in Group I is lower than Group II (p-value<0.05):								F-9	B-62	B-322
Groups(I & II) : CDM - NONM
Microbes with differential Correlation between Groups I,II :								F-2	B-74	B-76	B-85	B-163	B-322	B-325	B-326	V-10	V-12	V-13	V-14	V-16	V-21	V-113	V-135	V-148	V-169	V-173	V-174	V-208	V-283	V-284	V-288	V-330	V-398	V-502	V-541	V-543	V-567
Microbes that their abundance in Group I is lower than Group II (p-value<0.05):								B-74	B-85	B-322	B-325	B-326	V-113	V-283	V-284	V-288	V-398	V-543	V-567
Groups(I & II) : UCM - NONM
Microbes with differential Correlation between Groups I,II :								V-14	V-140	V-302	V-302	V-567	B-215	B-22	B-305	B-322	B-79	B-81
Microbes that their abundance in Group I is lower than Group II (p-value<0.05):								B-79	B-215	B-305	V-567
According to table S3:
Groups(I & II) : CDM - CDF
Microbes with differential Correlation between Groups I,II :								B-197	B-224	B-259	B-275	B-289	B-47	B-67	F-2	V-112	V-12	V-13	V-135	V-14	V-147	V-16	V-169	V-172	V-173	V-174	V-193	V-197	V-21	V-217	V-246	V-252	V-301	V-316	V-320	V-330	V-335	V-337	V-34	V-382	V-41	V-458	V-51	V-536	V-543	V-67	V-73	V-33
Microbes that their abundance in Group I is lower than Group II (p-value<0.05):								B-47	B-67	B-275	V-33	V-543
Groups(I & II) : UCF - UCM
Microbes with differential Correlation between Groups I,II :								B-321	B-392	B-81	F-9
Microbes that their abundance in Group I is lower than Group II (p-value<0.05):								F-9	B-81	B-321
Abbreviations: B,Bacteria; F,fungus; V,virus; CDM, CD in males; CDF, CD in femals; UCM, UC in males; UCF, UC in females; NONM, non-IBD in males; NONF, non-IBD in females.

## Sheet: Table S23_Important microbes
Table S23 : Important microbes in CD's or UC's gut interaction.
Groups		MICROB 1	abundanceS		MICROBE 2	abundanceS		P-value	(r1-r2)	lfdr (difference)	r1	r2		CD	importants
NONM	CDM	V Escherichia phage pro147	0.000310142	0.494377	V Escherichia phage pro483	0.014353	0.526578	0	-0.9	0	0	0.9			F-2
NONM	CDM	V Pseudomonas phage OBP	2.79619e-05	0.00117447	V Yersinia phage L-413C	0.0103605	0.394923	6.66134e-16	-0.8	9.61731e-15	0	0.8			V-16
NONM	CDM	V Pseudomonas phage OBP	2.79619e-05	0.00117447	V Escherichia phage pro483	0.014353	0.526578	2.22327e-11	-0.8	1.83419e-10	0	0.7			V-13
NONM	CDM	V Shigella phage Ss-VASD	0.00343368	0.0145236	B Bacteroides_sp_1_1_6	0.0534833	0.710908	9.0068e-12	0.8	7.70581e-11	0.7	-0.1			V-14
NONM	CDM	V Escherichia virus P2	0.00303839	0.631405	V Escherichia phage pro483	0.014353	0.526578	2.43872e-12	-0.6	2.16671e-11	0.3	0.9			V-21
NONM	CDM	B Lactococcus_lactis	6.77419e-06	0.000829176	V Escherichia virus P2	0.00303839	0.631405	7.89213e-06	0.6	3.72058e-05	0.6	0			V-12
NONM	CDM	V Escherichia virus P2	0.003	0.631	F Wickerhamomyces ciferrii	3.777	15.26	8.11171e-05	-0.4	0.000347001	0.4	0.8			V-135
NONM	CDM	V Enterobacteria phage Wphi	0.002	0.32	F Wickerhamomyces ciferrii	3.777	15.26	0.000664575	-0.3	0.00251667	0.3	0.6			V-458
NONM	CDM	V Escherichia phage pro147	0	0.494	F Wickerhamomyces ciferrii	3.777	15.26	0.00172334	-0.3	0.00631852	0.3	0.6			V-543
NONF	CDF	V Enterobacteria phage 9g	0.0265641	0.00014862	V Enterobacteria phage IME10	0.107813	0.00202435	0	-0.9	0	0.1	1			V-33
NONF	CDF	B Dysgonomonas_unclassified	2.22654e-05	0.308261	V Escherichia virus HK022	0.0462895	0.174125	4.95446e-10	-0.8	7.43169e-09	0	0.8			V-67
CDM	CDF	V Salmonella phage SE2	0.0258604	0.000176406	V Bacillus phage AR9	0.038529	1.75833e-05	0	-0.9	0	0.1	1			V-73
CDM	CDF	V Yersinia phage L-413C	0.394923	0.0165691	V Streptococcus phage SpSL1	0.481889	0.010631	4.40085e-09	-0.8	2.50604e-08	-0.2	0.7			V-174
CDM	CDF	V Escherichia virus P2	0.631	0.078	F Wickerhamomyces ciferrii	15.26	4.907	3.51431e-06	0.6	1.71532e-05	0.7	0.1			V-193
CDM	CDF	Enterobacteria phage Phi1	0.00368588	0.0665533	Parabacteroides phage YZ-2015b	5.70924	23.6646	0.00137795	0.5	0.00464987	0.2	-0.3			V-217
CDM	CDF	V Streptococcus phage SpSL1	0.482	0.011	F Wickerhamomyces ciferrii	15.26	4.907	0.00139996	-0.5	0.00470478	-0.1	0.4			V-247
CDM	CDF	V Enterobacteria phage Wphi	0.32	0.003	F Wickerhamomyces ciferrii	15.26	4.907	0.00197049	0.4	0.00642306	0.7	0.3			V-252*
CDM	CDF	V Yersinia phage L-413C	0.395	0.017	F Wickerhamomyces ciferrii	15.26	4.907	0.00552	0.4	0.0165197	0.7	0.3			V-301
CDM	CDF	V Pseudomonas phage phiKZ	1.375	0.404	F Wickerhamomyces ciferrii	15.26	4.907	0.000812466	-0.5	0.00288408	-0.6	-0.1			B-163
CDM	CDF	V Escherichia virus P2	0.631405	0.0780385	V Bacteroides phage B124-14	17.2391	4.45989	0.000856314	-0.5	0.00300076	-0.5	0			B-76
CDM	CDF	V Parabacteroides phage YZ-2015b	5.709	23.665	F Wickerhamomyces ciferrii	15.26	4.907	0.0149561	0.4	0.0402097	-0.1	-0.5			B-89
CDM	CDF	V Escherichia phage pro147	0.494	0.106	F Wickerhamomyces ciferrii	15.26	4.907	0.00650367	0.3	0.0190465	0.7	0.3			B-322
NONM	CDM	B Megamonas_unclassified	0.032438	0.000235003	V uncultured crAssphage	41.2153	13.7262	1.73372e-05	0.6	0.000104699	0.5	-0.1			V-567
NONM	CDM	V Cafeteria roenbergensis virus BV-PW1	9.19592e-05	0.0153785	V Enterobacteria phage mEp235	0.00503304	0.0183153	1.64999e-11	0.8	2.13124e-10	0.7	-0.1			V-543
NONM	CDM	B Bacteroides_sp_1_1_6	0.0534833	0.710908	V Parabacteroides phage YZ-2015b	13.9532	5.70924	0.000446599	-0.5	0.00231844	-0.1	0.4			V-541
NONM	CDM	V Escherichia phage pro147	0.000310142	0.494377	V Enterobacteria phage If1	0.0182009	0.4086	0	-0.9	0	0	0.9			V-330
NONM	CDM	F Wickerhamomyces ciferrii	3.77741	15.2627	V Enterobacteria phage If1	0.0182009	0.4086	1.52092e-05	-0.5	9.30563e-05	0.2	0.7			V-502
Groups		MICROB 1	abundanceS		MICROBE 2	abundanceS		P-value	(r1-r2)	lfdr (difference)	r1	r2		UC	B-81
NONM	UCM	V Bacteroides phage B40-8	0.0159469	1.90741	B Bacteroides_stercoris	2.75954	11.1751	0.000820873	0.6	0.0246262	0.1	-0.5			V-302
NONM	UCM	B Collinsella_intestinalis	0.000365484	0.145942	V Bacteroides phage B40-8	0.0159469	1.90741	1.24345e-13	-0.9	1.49214e-11	0	0.9			B-215
NONM	UCM	B Clostridium_citroniae	0.00241774	0.000637421	V Salmonella phage RE-2010	0.134354	2.23197	0.00247929	0.5	0.0495859	0.3	-0.2			B-22
UCF	UCM	B Megamonas_rupellensis	0.00477938	0.0889378	F Malassezia globosa CBS 7966	12.4258	28.5005	0.000210458	0.6	0.0318239	0.5	-0.2			B-321
UCF	UCM	B Akkermansia_muciniphila	0.42213	0.0932721	B Bacteroides_stercoris	4.92158	11.1751	0.000415999	0.6	0.0318239	0.6	0			B-392
NONF	UCF	V Streptococcus virus Sfi19	0.000252203	0.0530282	V Enterobacteria phage 9g	0.0265641	0.00160243	0.000731313	-0.5	0.0402222	0	0.5			F-9
NONM	UCM	B Megamonas_unclassified	0.032438	0.377453	V uncultured crAssphage	41.2153	6.44445	0.000579493	0.6	0.0231797	0.5	-0.1			V-140*
															V-252*
															V-279
Groups		MICROB 1	abundanceS		MICROBE 2	abundanceS		P-value	(r1-r2)	lfdr (difference)	r1	r2		UC-CD	B-333
CDM	UCM	V Escherichia phage pro147	0.494377	0.17242	V Streptococcus phage TP-J34	0.753046	0.125003	4.14753e-07	-0.8	6.06577e-06	-0.1	0.6			V-148*
CDM	UCM	V Staphylococcus phage SA1	0.00879143	0.00318743	B Fusobacterium_nucleatum	0.444624	0.00528003	0.00036829	0.6	0.00366155	0.5	0			V-169
CDM	UCM	V Shigella phage 75/02 Stx	0.0397033	0.00634118	B Fusobacterium_nucleatum	0.444624	0.00528003	0.00137343	0.5	0.011211	0.5	0			V-173
CDM	UCM	V Escherichia phage TL-2011c	0.0155185	0.00400483	B Fusobacterium_nucleatum	0.444624	0.00528003	0.000819699	0.5	0.00737729	0.5	0			V-458
CDF	UCF	V Streptococcus phage SpSL1	0.010631	1.02036	V Parabacteroides phage YZ-2015b	23.6646	11.2888	0.00262483	-0.5	0.0461882	-0.2	0.3			V-460
CDF	UCF	V Streptococcus phage SpSL1	0.010631	1.02036	V Enterobacteria phage If1	0.285054	0.0896372	0.000927535	0.6	0.0246084	0.5	-0.1			V-543
															V-13
															V-458
															V-541
						∩ ImportantS:		V-543	V-458	V-252*	V-13
								V Parabacteroides phage YZ-2015b	Streptococcus phage SpSL1	V Streptococcus virus Sfi19	V Escherichia phage pro147
Abbreviations: B,Bacteria; F,fungus; V,virus; CDM, CD in males; CDF, CD in femals; UCM, UC in males; UCF, UC in females; NONM, non-IBD in males; NONF, non-IBD in females.

## Sheet: Table S24_Shared Edges
Table S24:	38 shared edges in differential correlation networks (between 12 bacteriophage nodes and one fungus node).
Edges NU.:	(color)score	Edge		Network1	differential corrleation in Network1	Network2	differential corrleation in Network2	Network3	differential corrleation in Network3				Nodes :		V-12	V-13	V-135	V-173	V-169	V-16	V-21	V-14	F-2	V-174	V-148	V-193	V-252	B-322	V-541	V-567
1		V-135	V-12	NONM-CDM	-0.9	CDM-CDF	0.9	CDM-UCM	0.3
2		V-135	V-21	NONM-CDM	-0.8	CDM-CDF	0.8						(color)score:		red=High,		no color=low,		yellow=remarkable.
3		V-12	V-13	NONM-CDM	-1	CDM-CDF	0.4	CDM-UCM	0
4		V-21	V-13	NONM-CDM	-1	CDM-CDF	0.4
5		V-135	V-14	NONM-CDM	-0.8	CDM-CDF	0.5
6		V-173	V-13	NONM-CDM	-0.9	CDM-CDF	0.4	CDM-UCM	0.3
7		V-173	V-16	NONM-CDM	-0.6	CDM-CDF	0.6
8		V-21	V-14	NONM-CDM	-0.6	CDM-CDF	0.6
9		V-14	V-13	NONM-CDM	-0.9	CDM-CDF	0.3
10		V-135	V-173	NONM-CDM	-0.8	CDM-CDF	0.3
11		V-169	V-13	NONM-CDM	-0.8	CDM-CDF	0.3
12		V-135	V-16	NONM-CDM	-0.2	CDM-CDF	0.8
13		V-12	V-14	NONM-CDM	-0.4	CDM-CDF	0.6
14		V-16	F-2	NONM-CDM	-0.4	CDM-CDF	0.6
15		V-173	V-21	NONM-CDM	-0.6	CDM-CDF	0.4
16		V-14	V-16	NONM-CDM	-0.6	CDM-CDF	0.4
17		V-173	V-12	NONM-CDM	-0.4	CDM-CDF	0.5	CDM-UCM	0.4
18		V-174	V-16	NONM-CDM	-0.5	CDM-CDF	0.4
19		V-169	V-16	NONM-CDM	-0.5	CDM-CDF	0.4
20		V-169	V-21	NONM-CDM	-0.5	CDM-CDF	0.3
21		V-21	V-16	NONM-CDM	-0.6	CDM-CDF	0.2
22		V-12	F-2	NONM-CDM	-0.3	CDM-CDF	0.4
23		V-12	V-16	NONM-CDM	-0.4	CDM-CDF	0.3
24		V-135	V-173	NONM-CDM	-0.8	CDM-UCM	-0.2	CDM-CDF	0.3
25		V-148	V-13	NONM-CDM	-0.8	CDM-UCM	-0.2
26		V-135	F-2	NONM-CDM	-0.3	CDM-CDF	0.3
27		V-169	V-12	NONM-CDM	-0.3	CDM-CDF	0.3	CDM-UCM	0.2
28		V-13	F-2	NONM-CDM	-0.3	CDM-CDF	0.3
29		V-174	V-21	NONM-CDM	-0.5	CDM-CDF	0.1
30		V-174	V-14	NONM-CDM	-0.1	CDM-CDF	0.4
31		V-252	V-193	NONF-CDF	-0.9	CDM-CDF	-0.4
32		V-174	V-12	NONM-CDM	-0.2	CDM-CDF	0.2
33		V-12	V-21	NONM-CDM	-0.4	CDM-CDF	0
34		V-135	V-169	NONM-CDM	-0.7	CDM-UCM	-0.3
35		V-173	V-169	CDM-UCM	-0.1	CDM-CDF	0.2
36		V-169	V-14	NONM-CDM	0.2	CDM-CDF	0.5
37		V-135	V-13	CDM-UCM	0.2	CDM-CDF	0.3	NONM-CDM	0.2
38		V-148	V-12	NONM-CDM	-0.1	CDM-UCM	-0.1
39		V-169	V-541	NONM-CDM	-0.6	CDM-UCM	0.4
40		V-173	V-541	NONM-CDM	-0.6	CDM-UCM	0.4
41		V-12	V-541	NONM-CDM	-0.2	CDM-UCM	-0.1
42		V-13	V-541	NONM-CDM	-0.9	CDM-UCM	-0.1
43		V-148	V-541	NONM-CDM	-0.3	CDM-UCM	-0.2
44		B-322	V-567	NONM-CDM	0.6	NONM-UCM	0.6
Abbreviations: B,Bacteria; F,fungus; V,virus; CDM, CD in males; CDF, CD in femals; UCM, UC in males; UCF, UC in females; NONM, non-IBD in males; NONF, non-IBD in females.

## Sheet: Table S25_Abbreviations
Table S25:	Abbreviations.
Abbreviations: B,Bacteria; F,fungus; V,virus; CDM, CD in males; CDF, CD in femals; UCM, UC in males; UCF, UC in females; NONM, non-IBD in males; NONF, non-IBD in females.
	V-species																	Bacteriya													Fungi
	V-10		Viruses|dsDNA viruses, no RNA stage|Caudovirales|Myoviridae|Peduovirinae|P2virus|Enterobacteria phage fiAA91-ss															B-22		c__Actinobacteria	o__Coriobacteriales	f__Coriobacteriaceae	g__Collinsella	s__Collinsella_intestinalis							F-2		Fungi|Dikarya|Ascomycota|Saccharomycetes|Saccharomycetales|Phaffomycetaceae|Wickerhamomyces |Wickerhamomyces ciferrii
	V-12		Viruses|dsDNA viruses, no RNA stage|Caudovirales|Myoviridae|Peduovirinae|P2virus|Enterobacteria phage WPhi															B-47		c__Bacteroidia	o__Bacteroidales	f__Rikenellaceae	g__Alistipes	s__Alistipes_putredinis							F-9		Eukaryota|Basidiomycota|Malasseziomycetes|Malasseziales|Malasseziaceae|Malassezia|Malassezia globosa|Malassezia globosa CBS 7966
	V-13		Viruses|dsDNA viruses, no RNA stage|Caudovirales|Myoviridae|Peduovirinae|P2virus|Escherichia phage pro147															B-62		c__Bacteroidia	o__Bacteroidales	f__Bacteroidaceae	g__Bacteroides	s__Bacteroides_eggerthii
	V-14		Viruses|dsDNA viruses, no RNA stage|Caudovirales|Myoviridae|Peduovirinae|P2virus|Escherichia phage pro483															B-67		c__Bacteroidia	o__Bacteroidales	f__Bacteroidaceae	g__Bacteroides	s__Bacteroides_gallinarum
	V-16		Viruses|dsDNA viruses, no RNA stage|Caudovirales|Myoviridae|Peduovirinae|P2virus|Escherichia virus P2															B-74		c__Bacteroidia	o__Bacteroidales	f__Bacteroidaceae	g__Bacteroides	s__Bacteroides_salyersiae
	V-17		Viruses|dsDNA viruses, no RNA stage|Caudovirales|Myoviridae|Peduovirinae|P2virus|Salmonella phage FSL SP-004															B-76		c__Bacteroidia	o__Bacteroidales	f__Bacteroidaceae	g__Bacteroides	s__Bacteroides_sp_1_1_6
	V-21		Viruses|dsDNA viruses, no RNA stage|Caudovirales|Myoviridae|Peduovirinae|P2virus|Yersinia phage L-413C															B-79		c__Bacteroidia	o__Bacteroidales	f__Bacteroidaceae	g__Bacteroides	s__Bacteroides_sp_4_3_47FAA
	V-33		Viruses|dsDNA viruses, no RNA stage|Caudovirales|Myoviridae|Tevenvirinae|Rb49virus|Enterobacteria phage Phi1															B-81		c__Bacteroidia	o__Bacteroidales	f__Bacteroidaceae	g__Bacteroides	s__Bacteroides_stercoris
	V-34		Viruses|dsDNA viruses, no RNA stage|Caudovirales|Myoviridae|Tevenvirinae|S16virus|Salmonella phage STML-198															B-85		c__Bacteroidia	o__Bacteroidales	f__Porphyromonadaceae	g__Butyricimonas	s__Butyricimonas_synergistica
	V-41		Viruses|dsDNA viruses, no RNA stage|Caudovirales|Myoviridae|Tevenvirinae|T4virus|Aeromonas virus Aeh1															B-89		c__Bacteroidia	o__Bacteroidales	f__Porphyromonadaceae	g__Dysgonomonas	s__Dysgonomonas_unclassified
	V-51		Viruses|dsDNA viruses, no RNA stage|Caudovirales|Myoviridae|Tevenvirinae|T4virus|Shigella phage Shfl2															B-163		c__Bacilli	o__Lactobacillales	f__Streptococcaceae	g__Lactococcus	s__Lactococcus_lactis
	V-67		Viruses|dsDNA viruses, no RNA stage|Caudovirales|Myoviridae|Unclassified|Phikzvirus|Pseudomonas phage phiKZ															B-197		c__Clostridia	o__Clostridiales	f__Lachnospiraceae	g__Anaerostipes	s__Anaerostipes_unclassified
	V-73		Viruses|dsDNA viruses, no RNA stage|Caudovirales|Myoviridae|Unclassified|Unclassified|Bacillus phage AR9															B-199		c__Clostridia	o__Clostridiales	f__Ruminococcaceae	g__Anaerotruncus	s__Anaerotruncus_unclassified
	V-112		Viruses|dsDNA viruses, no RNA stage|Caudovirales|Myoviridae|Unclassified|Unclassified|Erwinia phage ENT90															B-215		c__Clostridia	o__Clostridiales	f__Clostridiaceae	g__Clostridium	s__Clostridium_citroniae
	V-113		Viruses|dsDNA viruses, no RNA stage|Caudovirales|Myoviridae|Unclassified|Unclassified|Erwinia phage vB_EamM_ChrisDB															B-224		c__Clostridia	o__Clostridiales	f__Clostridiaceae	g__Clostridium	s__Clostridium_scindens
	V-135		Viruses|dsDNA viruses, no RNA stage|Caudovirales|Myoviridae|Unclassified|Unclassified|Pseudomonas phage OBP															B-246		c__Clostridia	o__Clostridiales	f__Eubacteriaceae	g__Eubacterium	s__Eubacterium_ventriosum
	V-140		Viruses|dsDNA viruses, no RNA stage|Caudovirales|Myoviridae|Unclassified|Unclassified|Salmonella phage RE-2010															B-259		c__Clostridia	o__Clostridiales	f__Lachnospiraceae	g__Lachnospiraceae_noname	s__Lachnospiraceae_bacterium_6_1_63FAA
	V-147		Viruses|dsDNA viruses, no RNA stage|Caudovirales|Myoviridae|Unclassified|Unclassified|Sphingomonas phage PAU															B-265		c__Clostridia	o__Clostridiales	f__Oscillospiraceae	g__Oscillibacter	s__Oscillibacter_sp_KLE_1745
	V-148		Viruses|dsDNA viruses, no RNA stage|Caudovirales|Myoviridae|Unclassified|Unclassified|Staphylococcus phage SA1															B-275		c__Clostridia	o__Clostridiales	f__Clostridiales_noname	g__Pseudoflavonifractor	s__Pseudoflavonifractor_capillosus
	V-169		Viruses|dsDNA viruses, no RNA stage|Caudovirales|Podoviridae|Sepvirinae|Pocjvirus|Shigella phage 75/02 Stx															B-289		c__Clostridia	o__Clostridiales	f__Ruminococcaceae	g__Ruminococcus	s__Ruminococcus_sp_5_1_39BFAA
	V-172		Viruses|dsDNA viruses, no RNA stage|Caudovirales|Podoviridae|Sepvirinae|Tl2011virus|Escherichia phage phi191															B-296		c__Erysipelotrichia	o__Erysipelotrichales	f__Erysipelotrichaceae	g__Erysipelotrichaceae_noname	s__Clostridium_ramosum
	V-173		Viruses|dsDNA viruses, no RNA stage|Caudovirales|Podoviridae|Sepvirinae|Tl2011virus|Escherichia phage TL-2011c															B-305		c__Erysipelotrichia	o__Erysipelotrichales	f__Erysipelotrichaceae	g__Erysipelotrichaceae_noname	s__Erysipelotrichaceae_bacterium_6_1_45
	V-174		Viruses|dsDNA viruses, no RNA stage|Caudovirales|Podoviridae|Sepvirinae|Tl2011virus|Shigella phage Ss-VASD															B-313		c__Erysipelotrichia	o__Erysipelotrichales	f__Erysipelotrichaceae	g__Turicibacter	s__Turicibacter_unclassified
	V-193		Viruses|dsDNA viruses, no RNA stage|Caudovirales|Podoviridae|Unclassified|Unclassified|Enterobacteria phage IME10															B-321		c__Negativicutes	o__Selenomonadales	f__Veillonellaceae	g__Megamonas	s__Megamonas_rupellensis
	V-195		Viruses|dsDNA viruses, no RNA stage|Caudovirales|Podoviridae|Unclassified|Unclassified|Enterobacteria phage VT2phi_272															B-322		c__Negativicutes	o__Selenomonadales	f__Veillonellaceae	g__Megamonas	s__Megamonas_unclassified
	V-197		Viruses|dsDNA viruses, no RNA stage|Caudovirales|Podoviridae|Unclassified|Unclassified|Escherichia phage P13374															B-325		c__Negativicutes	o__Selenomonadales	f__Veillonellaceae	g__Mitsuokella	s__Mitsuokella_unclassified
	V-200		Viruses|dsDNA viruses, no RNA stage|Caudovirales|Podoviridae|Unclassified|Unclassified|Escherichia Stx1 converting phage															B-326		c__Negativicutes	o__Selenomonadales	f__Acidaminococcaceae	g__Phascolarctobacterium	s__Phascolarctobacterium_succinatutens
	V-208		Viruses|dsDNA viruses, no RNA stage|Caudovirales|Podoviridae|Unclassified|Unclassified|Salmonella phage SPN1S															B-333		c__Fusobacteriia	o__Fusobacteriales	f__Fusobacteriaceae	g__Fusobacterium	s__Fusobacterium_nucleatum
	V-217		Viruses|dsDNA viruses, no RNA stage|Caudovirales|Siphoviridae|Guernseyvirinae|Jerseyvirus|Salmonella phage SE2															B-346		c__Deltaproteobacteria	o__Desulfovibrionales	f__Desulfovibrionaceae	g__Desulfovibrio	s__Desulfovibrio_desulfuricans
	V-221		Viruses|dsDNA viruses, no RNA stage|Caudovirales|Siphoviridae|Guernseyvirinae|K1gvirus|Escherichia phage K1-dep(1)															B-378		c__Gammaproteobacteria	o__Enterobacteriales	f__Enterobacteriaceae	g__Proteus	s__Proteus_mirabilis
	V-222		Viruses|dsDNA viruses, no RNA stage|Caudovirales|Siphoviridae|Guernseyvirinae|K1gvirus|Escherichia phage K1-dep(4)															B-392		c__Verrucomicrobiae	o__Verrucomicrobiales	f__Verrucomicrobiaceae	g__Akkermansia	s__Akkermansia_muciniphila
	V-246		Viruses|dsDNA viruses, no RNA stage|Caudovirales|Siphoviridae|Unclassified|L5virus|Rhodococcus phage RGL3
	V-247		Viruses|dsDNA viruses, no RNA stage|Caudovirales|Siphoviridae|Unclassified|Lambdavirus|Escherichia virus HK022
	V-252		Viruses|dsDNA viruses, no RNA stage|Caudovirales|Siphoviridae|Unclassified|Nonagvirus|Enterobacteria phage 9g
	V-279		Viruses|dsDNA viruses, no RNA stage|Caudovirales|Siphoviridae|Unclassified|Sfi21dt1virus|Streptococcus virus Sfi19
	V-301		Viruses|dsDNA viruses, no RNA stage|Caudovirales|Siphoviridae|Unclassified|Unclassified|Bacteroides phage B124-14
	V-302		Viruses|dsDNA viruses, no RNA stage|Caudovirales|Siphoviridae|Unclassified|Unclassified|Bacteroides phage B40-8
	V-316		Viruses|dsDNA viruses, no RNA stage|Caudovirales|Siphoviridae|Unclassified|Unclassified|Cronobacter phage phiES15
	V-320		Viruses|dsDNA viruses, no RNA stage|Caudovirales|Siphoviridae|Unclassified|Unclassified|Enterobacteria phage HK106
	V-324		Viruses|dsDNA viruses, no RNA stage|Caudovirales|Siphoviridae|Unclassified|Unclassified|Enterobacteria phage HK542
	V-328		Viruses|dsDNA viruses, no RNA stage|Caudovirales|Siphoviridae|Unclassified|Unclassified|Enterobacteria phage HK633
	V-330		Viruses|dsDNA viruses, no RNA stage|Caudovirales|Siphoviridae|Unclassified|Unclassified|Enterobacteria phage mEp235
	V-331		Viruses|dsDNA viruses, no RNA stage|Caudovirales|Siphoviridae|Unclassified|Unclassified|Enterobacteria phage mEp237
	V-334		Viruses|dsDNA viruses, no RNA stage|Caudovirales|Siphoviridae|Unclassified|Unclassified|Enterobacteria phage mEpX2
	V-335		Viruses|dsDNA viruses, no RNA stage|Caudovirales|Siphoviridae|Unclassified|Unclassified|Enterobacteria phage phi80
	V-337		Viruses|dsDNA viruses, no RNA stage|Caudovirales|Siphoviridae|Unclassified|Unclassified|Enterobacterial phage mEp213
	V-363		Viruses|dsDNA viruses, no RNA stage|Caudovirales|Siphoviridae|Unclassified|Unclassified|Lactobacillus phage Lc-Nu
	V-382		Viruses|dsDNA viruses, no RNA stage|Caudovirales|Siphoviridae|Unclassified|Unclassified|Lactococcus phage 50101
	V-389		Viruses|dsDNA viruses, no RNA stage|Caudovirales|Siphoviridae|Unclassified|Unclassified|Lactococcus phage bIL310
	V-439		Viruses|dsDNA viruses, no RNA stage|Caudovirales|Siphoviridae|Unclassified|Unclassified|Salmonella phage SSU5
	V-458		Viruses|dsDNA viruses, no RNA stage|Caudovirales|Siphoviridae|Unclassified|Unclassified|Streptococcus phage SpSL1
	V-460		Viruses|dsDNA viruses, no RNA stage|Caudovirales|Siphoviridae|Unclassified|Unclassified|Streptococcus phage TP-J34
	V-536		Viruses|dsDNA viruses, no RNA stage|Unclassified|Unclassified|Unclassified|Unclassified|Vibrio phage pYD38-A
	V-541		Viruses|ssDNA viruses|Unclassified|unassigned Inoviridae|Unclassified|Unclassified|Enterobacteria phage If1
	V-543		Viruses|ssDNA viruses|Unclassified|unclassified Microviridae|Unclassified|Unclassified|Parabacteroides phage YZ-2015b
	V-567		Viruses|unclassified bacterial viruses|Unclassified|Unclassified|Unclassified|Unclassified|uncultured crAssphage
